1 **Virus-free and live-cell visualizing SARS-CoV-2 cell entry for studies of**  
2 **neutralizing antibodies and compound inhibitors**

3

4 Yali Zhang<sup>1,2,6</sup>, Shaojuan Wang<sup>1,2,6</sup>, Yangtao Wu<sup>1,2,6</sup>, Wangheng Hou<sup>1,2,6</sup>, Lunzhi Yuan<sup>1,2,6</sup>,  
5 Chenguang Sheng<sup>3,6</sup>, Juan Wang<sup>1,2</sup>, Jianghui Ye<sup>1,2</sup>, Qingbing Zheng<sup>1,2</sup>, Jian Ma<sup>1,2</sup>, Jingjing  
6 Xu<sup>4</sup>, Min Wei<sup>1,2</sup>, Zonglin Li<sup>1,2</sup>, Sheng Nian<sup>1,2</sup>, Hualong Xiong<sup>1,2</sup>, Liang Zhang<sup>1,2</sup>, Yang Shi<sup>1,2</sup>,  
7 Baorong Fu<sup>1,2</sup>, Jiali Cao<sup>1,2</sup>, Chuanlai Yang<sup>1,2</sup>, Zhiyong Li<sup>1,5</sup>, Ting Yang<sup>4</sup>, Lei Liu<sup>3</sup>, Hai Yu<sup>1,2</sup>,  
8 Jianda Hu<sup>4</sup>, Shengxiang Ge<sup>1,2</sup>, Yixin Chen<sup>1,2</sup>, Tianying Zhang<sup>1,2</sup>, Jun Zhang<sup>1,2</sup>, Tong  
9 Cheng<sup>1,2,\*</sup>, Quan Yuan<sup>1,2,\*</sup> and Ningshao Xia<sup>1,2,\*</sup>

10

11 <sup>1</sup> State Key Laboratory of Molecular Vaccinology and Molecular Diagnostics, School of  
12 Public Health & School of Life Sciences, Xiamen University, Xiamen 361102, Fujian, China.

13 <sup>2</sup> National Institute of Diagnostics and Vaccine Development in Infectious Diseases, School  
14 of Public Health & School of Life Sciences, Xiamen University, Xiamen 361102, Fujian,  
15 China.

16 <sup>3</sup> Shenzhen Key Laboratory of Pathogen and Immunity, National Clinical Research Center  
17 for Infectious Disease, Shenzhen Third People's Hospital, Second Hospital Affiliated to  
18 Southern University of Science and Technology, Shenzhen 518112, Guangdong, China

19 <sup>4</sup> Department of Hematology, Fujian Medical University Union Hospital, Fujian Provincial  
20 Key Laboratory on Hematology, Fujian Institute of Hematology, Fuzhou 350001, Fujian,  
21 China.

22 <sup>5</sup> The First Hospital of Xiamen University, Xiamen 361003, China.

23 <sup>6</sup> These authors contributed equally to this article.

24 \* Correspondence: [yuanquan@xmu.edu.cn](mailto:yuanquan@xmu.edu.cn) (Y.Q.), [tcheng@xmu.edu.cn](mailto:tcheng@xmu.edu.cn) (C.T.),  
25 [nsxia@xmu.edu.cn](mailto:nsxia@xmu.edu.cn) (X.N.)

26

27

28

29

30

31

32

1    **Abstract**

2    The ongoing COVID-19 pandemic, caused by SARS-CoV-2 infection, has resulted in  
3    hundreds of thousands of deaths. Cellular entry of SARS-CoV-2, which is mediated by  
4    the viral spike protein and host ACE2 receptor, is an essential target for the  
5    development of vaccines, therapeutic antibodies, and drugs. Using a mammalian cell  
6    expression system, we generated a recombinant fluorescent protein (Gmillus)-fused  
7    SARS-CoV-2 spike trimer (STG) to probe the viral entry process. In ACE2-expressing  
8    cells, we found that the STG probe has excellent performance in the live-cell  
9    visualization of receptor binding, cellular uptake, and intracellular trafficking of SARS-  
10    CoV-2 under virus-free conditions. The new system allows quantitative analyses of the  
11    inhibition potentials and detailed influence of COVID-19-convalescent human plasmas,  
12    neutralizing antibodies and compounds, providing a versatile tool for high-throughput  
13    screening and phenotypic characterization of SARS-CoV-2 entry inhibitors. This  
14    approach may also be adapted to develop a viral entry visualization system for other  
15    viruses.

16

17    **Key words:** SARS-CoV-2; coronavirus; spike glycoprotein; fluorescent protein; live-  
18    cell imaging; viral entry visualization; high-throughput screen; high-content analysis;  
19    entry inhibitor;

20

21

22

23

24

25

26

27

28

29

30

31

32

33

34

35

36

37

## 1 **Introduction**

2 Since previous outbreaks of SARS-CoV-1 in 2002 and MERS-CoV in 2012,  
3 COVID-19 caused by SARS-CoV-2 infection has become pandemic<sup>1-4</sup>. The  
4 development of therapeutic and preventative agents against SARS-CoV-2 infection is  
5 urgently needed. Viral cellular entry is the first step for the establishment of a  
6 productive viral infection<sup>5</sup>. Effective inhibition of viral entry is an important goal for the  
7 development of antiviral antibodies, vaccines, and drugs<sup>6-8</sup>. The cell entry of SARS-  
8 CoV-2 is mediated by viral spike (S) glycoprotein and its interaction with the cellular  
9 ACE2 receptor<sup>9-14</sup>. To date, a variety of approaches have been employed to develop  
10 prophylactic and therapeutic measures aimed at functional blockage of SARS-CoV-2  
11 cell entry<sup>15-19</sup>.

12 Current cell-based assays for study SARS-CoV-2 cell entry, using either authentic  
13 virus or spike-bearing pseudotyping virus<sup>20-22</sup>, require biosafety facilities and multistep  
14 experimental procedures and are time-consuming, which has greatly limited relevant  
15 studies, particularly high-throughput screening studies. With the goal of establishing  
16 an ideal system for high-throughput screening of SARS-CoV-2 entry inhibitors in virus-  
17 free conditions and facilitating the development of antibodies and vaccines, we  
18 developed a fluorescent SARS-CoV-2 entry probe that can be visualized and  
19 quantified via live-cell imaging. Using the novel probe, we established a one-step  
20 ultrafast assay for characterization of various SARS-CoV-2 entry inhibitors. The  
21 practical applicability of the new system was systematically evaluated by using human  
22 COVID19-convalescent plasmas, immunized mouse sera, monoclonal antibodies  
23 (mAbs) and compound inhibitors.

24

## 25 **Recombinant FP-fused spike proteins of coronaviruses**

26 The constructs used to produce the recombinant FP-fused coronavirus spike  
27 probes contain the following elements: (i) an N-terminal signal peptide; (ii) a receptor-  
28 binding domain (RBD) or the S-ectodomain; (iii) a flexible-linker following green  
29 fluorescent protein (GFP); and (iiii) a T4-fibrin foldon (TFd) for trimerization the S-  
30 ectodomain (Figure 1A). The Gamillus (mGam) and mNeonGreen (mNG) were tested  
31 as the fused-GFP because mGam is acid-tolerant, which may enable fluorescent  
32 tracking when the probe is taken up into acidic cellular organelles<sup>23</sup>, and mNG is the  
33 brightest GFP to our knowledge<sup>24</sup>. We designated the RBD-based probes as RBG  
34 (mGam-fused) or RBN (mNG-fused) and designated the S-ectodomain trimer (ST)-  
35 based probes as STG (mGam-fused) and STN (mNG-fused). We expressed  
36 recombinant RBG proteins for the SARS-CoV-2, SARS-CoV-1, MERS, HKU1 and  
37 RaTG13 coronaviruses and STG and STN probes for SARS-CoV-2 in CHO cells

1 (Figure 1B and Figure S1). Non-FP-fused SARS-CoV2-RBD and SARS-CoV2-ST  
2 proteins and a nontrimerized mGam-fused S-ectodomain (SARS-CoV2-SMG) were  
3 also produced. The molecular weights of the SARS-CoV2-STG and SARS-CoV2-STN  
4 were determined to be approximately 808-kd by size-exclusion chromatogram (Figure  
5 1C, Figure S2A-B). Furthermore, Cryo-EM reconstructions of the SARS-CoV2-ST  
6 (Figure S2C) and SARS-CoV2-STN (Figure S2D) both demonstrated a typical trimeric  
7 structure<sup>9, 10</sup>. The binding affinities of SARS-CoV2-STG and SARS-CoV2-RBG to  
8 human ACE2 (hACE2) were 18.2 nM and 30.4 nM (Figure 1D), respectively, which  
9 were similar to previously reported data for unfused proteins<sup>9, 10</sup>. Together, C-terminal  
10 FP-fusion does not influence the structure and ACE2-binding capability of the RBD and  
11 S-ectodomain of SARS-CoV-2.

### 12 **Establishment of virus-free assays to visualize SARS-CoV-2 cell entry**

13 We established hACE2-overexpressing cell lines using the ACE2hR and  
14 ACE2iRb3 constructs (Figure 2A). Cell-transfection with ACE2hR allowed hACE2-  
15 overexpression with nucleus visualization (H2B-mRuby3). ACE2iRb3 contains an  
16 ACE2-mRuby3 expressing cassette following an IRES-ligated H2B-iRFP670-2A-  
17 PuroR. Transfection with ACE2iRb3 simultaneously enabled fluorescent visualization  
18 of hACE2 (hACE2-mRuby3) and nucleus (H2B-iRFP670). Using these vectors, we  
19 developed three stable cell lines, namely, 293T-ACE2iRb3, 293T-ACE2hR and H1299-  
20 ACE2hR. As expected, hACE2 (or ACE2-mRuby3) was expressed at high levels, and  
21 the expression of TMPRSS2 (another critical factor for viral entry)<sup>12</sup> did not change in  
22 these cells (Figure 2B).

23 On 293T-ACE2iRb3 cells, both the SARS-CoV2-RBG and SARS-CoV2-STG  
24 probes showed effective-binding to the cells, as membrane-bound and hACE2-  
25 mRuby3-colocalized mGam signals were observed after a 6-min incubation with the  
26 cells (Figure 2C). Cytoplasmic mGam signals were detected in cells after incubation  
27 for 60-min or longer with the probes, particularly for SARS-CoV2-STG, suggesting that  
28 the recombinant probes can not only bind to the cell surface but also be taken up into  
29 the cells. The internalization of SARS-CoV2-STG was more evident than that of SARS-  
30 CoV2-RBG into 293T-ACE2iRb3 (Figure 2C). In live-cell dynamic tracking, more  
31 internalized mGam signals was observed for SARS-CoV2-STG than SARS-CoV2-  
32 RBG (Figure S3A). For mGam signals, the internalized fluorescence ratio (IFR, Figure  
33 S3B) and the internalized vehicle numbers (IVNs, Figure S3D) of STG-treated cells  
34 were both significantly higher than those of RBG-treated cells approximately 30-min  
35 after probe-cell incubation. In contrast, no significant difference was noted in hACE2-  
36 mRuby3 internalization in the presence or absence of probes (Figure S3C).

37 Using 293T-ACE2iRb3 cells, we established a cell-based assay mimicking SARS-



1 CoV-2 cell entry based on recombinant probes. It was a one-step wash-free assay  
2 (Figure 2D). After 1-hour cell-probe incubation, the cells were directly imaged by using  
3 a fully automatic high-content screening (HCS) system in confocal mode. For  
4 quantitative measurements, the H2B-iRFP670 were used to identify the nucleus, and  
5 the ACE2-mRuby3 were used to determine the cell boundary. Based on the detected  
6 nucleus and cell outlines, the green fluorescence intensities on the cell membrane and  
7 in the cytoplasmic region of each cell could be measured (Figure 2D). Generally, we  
8 used the mean fluorescence intensity (MFI) in the cytoplasmic region (cMFI) as an  
9 index of the amounts of the cell-bound and internalized probes. As the spikes of MRES-  
10 CoV and HKU1-CoV do not interact with hACE2, the signals of MERS-RBG and HKU1-  
11 RBG on 293T-ACE2iRb3 were nonspecific background (Figure 2E). RaTG13-RBG  
12 showed a detectable and dose-dependent cMFI, but the value was significantly lower  
13 than those of the probes of SARS-CoV-1 and SARS-CoV-2. Compared to SARS-  
14 CoV1-RBG, SARS-CoV2-RBG showed slightly stronger signals, possibly due to its  
15 higher binding affinity. For SARS-CoV-2, the cMFI of SARS-CoV2-STG, SARS-CoV2-  
16 STN and SARS-CoV2-ST488 were significantly higher than that of SARS-CoV2-RBG  
17 and SARS-CoV2-RBD488, and also stronger than SARS-CoV2-SMG. The dylight488-  
18 labeled SARS-CoV2-RBD488 probe presented a weaker signal than SARS-CoV2-  
19 RBG, suggesting that the NH<sub>2</sub>-dye modification at some amino acids of the RBD may  
20 interfere with its interaction with hACE2. Moreover, mGam-fused probes showed better  
21 performance than dylight488-labeled or mNG-fused probes (Figure 2F). At a  
22 concentration below than 10 nM, the cMFI of SARS-CoV2-STG was approximately 10-  
23 fold higher than that of SARS-CoV2-RBG.

24 Based on the visualization system, we developed cell-based HCS assays for  
25 analyzing the blocking potencies of SARS-CoV-2 entry inhibitors, designated CSBT  
26 (using SARS-CoV2-STG) and CRBT (using SARS-CoV2-STG), respectively. The  
27 proteins of hACE2-Fc (rACE2), SARS-CoV2-RBD and SARS-CoV2-S1 were  
28 employed for inhibition assessments following the procedure described in Figure 2D.  
29 As expected, all three proteins exhibited dose-dependent cMFI inhibition in both  
30 assays (Figure 2G). The Z'-factor coefficients of the CSBT and CRBT were both  
31 determined to be over 0.7 (Figure S3E), which demonstrated their robustness and  
32 reproducibility.

### 33 **Detecting entry-blocking antibodies in COVID-19-convalescent human plasmas** 34 **by CSBT and CRBT.**

35 Recent studies have suggested that convalescent plasma may be beneficial in  
36 COVID-19 treatments<sup>25, 26</sup>. Neutralization antibodies (NAbs) in convalescent plasmas  
37 may be essential in suppressing viruses<sup>27</sup>. However, a rapid method for determining

1 the neutralization antibody titer (NAT) of human plasma is still absent. We evaluated  
2 the feasibility of the CSBT and CRBT determined entry-blocking antibody titers as NAT  
3 surrogates in 32 COVID-19-convalescent human plasmas (Table S1). Compared with  
4 samples from healthy donors (n=40), all COVID-19-convalescent plasmas showed  
5 significant cMFI inhibition on CSBT assay, whereas only 12 samples (37.5%) had  
6 detectable CRBT activity (Figure 3A). For quantitative analysis, two-fold serial dilution  
7 tests were further performed to determine the CSBT and CRBT titers (Figure 3B).  
8 Moreover, the titers of total antibodies (TAb), IgG, IgM, and lentiviral-pseudotyping-  
9 particles (LVpp) based NAT (LVppNAT) against SARS-CoV-2 were also measured for  
10 comparisons (Figure 3C). Among the antibody titers derived from various assays, the  
11 CSBT titer showed the best correlation with LVppNAT (Figure 3D and Table S2,  
12  $r=0.832$ ,  $p<0.001$ ), and it also well correlated ( $r=0.959$ ,  $p<0.001$ , Figure 3D) with the  
13 neutralization activity against authentic SARS-CoV-2 virus in 12 representative  
14 samples (Table S3). Together, the CSBT-determined entry-blocking antibody titer is a  
15 good NAb surrogate of convalescent plasmas.

#### 16 **Functional phenotyping of mouse anti-spike antibodies by CSBT and CRBT.**

17 Serum samples from mice immunized with the SARS-CoV2-RBD, SARS-CoV2-  
18 S1 and SARS-CoV2-S2 were collected for LVppNAT, CSBT and CRBT measurements.  
19 The SARS-CoV2-RBD and SARS-CoV2-S1 immunizations resulted in potent and  
20 comparable serum LVppNAT (Figure S4A), whereas SARS-CoV2-S2 raised little NAb.  
21 The CSBT (Figure S4B) and CRBT (Figure S4C) assays also exhibited similar results  
22 to LVppNAT measurements. The ID50 correlation coefficient was 0.989 ( $p<0.001$ )  
23 between CSBT and LVppNAT and 0.925 ( $p<0.001$ ) between CRBT and LVppNAT.

24 Using RBD-immunized mice, we developed 18 mAbs via RBD-ELISA screening  
25 following cell-based functional evaluations (as illustrated Figure 4A). These mAbs did  
26 not display much difference in ELISA-binding to SARS-CoV2-RBD, but 2 of them (8H6  
27 and 15A9) showed significantly decreased ELISA-binding activities to SARS-CoV2-ST  
28 (Figure S5A). Based on epitope-binning assays using a cross-competitive ELISA, the  
29 mAbs could be divided into six groups (Figure S5B). All mAbs showed detectable but  
30 varied surface plasmon resonance (SPR) affinity (0.004-131 nM, Figure S6) to SARS-  
31 CoV2-RBD. Quantitative measurements of CSBT, CRBT and LVppNAT for the mAbs  
32 were further performed (Figure 4B to C, Figure S7A to C). Half of the mAbs exhibited  
33 high-to-moderate CSBT blocking potencies ( $IC_{50}<30$  nM), whereas the remaining  
34 ones showed low-to-no CSBT activities (Figure 4B). In comparisons of the dose-  
35 dependent cMFI inhibitions against SARS-CoV2-STG, SARS-CoV2-ST488, SARS-  
36 CoV2-RBG, and SARS-CoV1-RBG (Figure 4C), the profiles of most mAbs against  
37 SARS-CoV2-STG and SARS-CoV2-ST488 were similar, but the activities of 2B4 and

1 34B4 were dramatically decreased with SARS-CoV2-ST488 compared to SARS-  
2 CoV2-STG, suggesting that dye-conjugation may modify the epitopes of the two mAbs  
3 and hinder their bindings. Notably, seven mAbs exhibited striking enhancement at  
4 some dosage in the CRBT assays (Figure 4C and Figure S7B), but neither  
5 enhancement was noted in the CSBT nor LVppNAT tests. SPR analyses demonstrated  
6 that the Fabs of two representative CRBT-enhancing mAbs, 53G2 and 8H6, also  
7 showed a dose-dependent promoting effect on the RBD-ACE2 binding, whereas the  
8 Fabs of two CRBT-blocking mAbs (36H6 and 2B4) exhibited a dose-dependent  
9 reduction in the RBD-ACE2 interaction (Figure S8). Together, the CRBT-enhancing  
10 effects of these mAbs may be caused by the antibody-induced RBD conformation  
11 changes associated with increases in ACE2-binding capacity.

12 The functional potencies of mAbs determined by various assays are summarized  
13 in Figure 4D and Table S4. The CSBT-IC50 values of the mAbs showed the good  
14 correlation with their LVppNAT IC90 ( $r=0.866$ ,  $p<0.001$ , Figure 4E) or IC50 ( $r=0.750$ ,  
15  $p<0.001$ , Figure S9) values, and were also well correlated with their CRBT-IC50 values  
16 ( $r=0.869$ ,  $p<0.001$ , Figure 4E). However, a 53G2 mAb presented CSBT activity but no  
17 inhibition in the CRBT assay, suggesting that its CSBT activity is independent of the  
18 direct blocking of the RBD-ACE2 interaction (Figure 4D). An 83H7 mAb with moderate  
19 LVppNAT activity but showed neither CSBT nor CRBT inhibition (Figure 4D),  
20 suggesting it may act through different mechanisms to achieve neutralization. No  
21 significant relationship was noted between the ELISA- or SPR-determined protein-  
22 binding activities and neutralization potencies of the mAbs (Figure S9).

23 According to the SPR (Figure S10) and CRBT analyses using SARS-CoV1-RBG  
24 (Figure 4C), the 2B4, 34B4, 5F3, 18C5, and 8H6 mAbs showed cross-reactivity to  
25 SARS-CoV-1 and RaTG13-CoV. However, only the 2B4 mAb had neutralization activity  
26 in SARS-CoV-1 LVppNAT measurements (Figure S7D). Epitope-binning assay (Figure  
27 S5B) suggested that 2B4, 34B4, 5F3 and 14D2 possibly share an overlapping-epitope  
28 (cluster C2), and 18C5, 8H6, 83H7 and 65G9 may bind to another similar epitope (mAb  
29 cluster C5b). As 2B4 showed comparable LVppNAT potencies against both SARS-  
30 CoV-1 and SARS-CoV-2, it may recognize a cross-neutralization epitope. The 36H6  
31 mAb, which recognizes a unique epitope that differs from other mAbs (mAb cluster C1,  
32 Figure S5B), presented the best performance in LVppNAT, CSBT, and CRBT assays  
33 but did not show any cross-reactivity with SARS-CoV-1 or RaTG13. Both 36H6 and  
34 2B4 have neutralization activities against the authentic SARS-CoV-2 virus (Figure  
35 S7E), and the 36H6 exhibited superior neutralization activity with an IC50 of 0.079 nM  
36 (11.9 ng/mL).

37 **Characterization of the neutralization mechanisms of mAbs by STG-based viral**

1 **entry visualizing system.**

2 The 83H7 mAb showed SARS-CoV-2 neutralization activity against both  
3 pseudoparticles (IC<sub>50</sub>=0.99 nM) and the authentic virus (IC<sub>50</sub>=13.02 nM) but had  
4 neither CSBT nor CRBT activity. We speculated that this mAb may inhibit the SARS-  
5 CoV-2 via an intracellular neutralization pathway<sup>28</sup>. To validate this, we prepared  
6 dylight633-labeled mAbs (Ab633) of 36H6, 53G2, 83H7, and 8H6 and an irrelevant  
7 mAb (ctrAb) for dual-visualizing tracking. Among them, 36H6, 53G2 and 8H6 served  
8 as controls that had strong, moderate and weak/no activity for both CSBT and  
9 neutralization, respectively. In 293T-ACE2iRb3 cells simultaneously incubated with  
10 STG and Ab633, we performed time-serial live-cell imaging analyses. To characterize  
11 the influence of these mAbs on SARS-CoV2-STG internalization, the dynamic changes  
12 of the STG-IVNs, the STG-IVpMFI (the peak MFI of internalized vesicles), the Ab633-  
13 IVNs, the Ab633-IVpMFI, and the percentage of STG/Ab633-colocalized internalized  
14 vesicles, and the STG-IVA were calculated (Figure 5). As expected, 36H6 completely  
15 obstructed STG internalization (p<0.001), 53G2 showed significant but incomplete  
16 inhibition (p=0.002), and 8H6 presented little/no influence on STG internalization  
17 (p=0.70). Compared to ctrAb, the 83H7 showed no significant STG-IVNs reduction  
18 (p=0.31, Figure 5A) but increased the STG-IVpMFI (p<0.001, Figure 5B). On the other  
19 hand, the 83H7 group exhibited higher Ab633-IVNs (p<0.001, Figure 5C) and Ab633-  
20 IVpMFI (p<0.001, Figure 5D). The STG/Ab633 colocalization (p<0.001, Figure 5E) and  
21 the STG-IVA (p<0.001, Figure 5F) in the 83H7 group were also significantly higher and  
22 larger, respectively, than those in the other groups. Representative images at 5-hour  
23 post STG/Ab633-cell incubation, as shown in Figure 5G, further confirmed these  
24 findings. These results demonstrated that 83H7 could efficiently enter cells in the  
25 presence of the SARS-CoV-2 S protein. The enlarged internalized STG vesicles in  
26 associating with 83H7 suggested that the mAb may induce aggregation and disturb  
27 intercellular function of S protein, which may contribute to its neutralization activity.

28 **Visualization of the influence of compounds on SARS-CoV-2 cell entry.**

29 Previous studies suggested that the SARS-CoV-2 gains entry into cells via  
30 endocytosis. In this study, 11 inhibitors targeting various processes of endocytosis and  
31 endosome maturation were evaluated (Figure 6A). In SARS-CoV-2 LVpp infection tests  
32 (Figure 6B), the micropinocytosis inhibitor cytochalasin-D (CytD) and the clathrin-  
33 dependent endocytosis (CME) inhibitors dynasore and dansylcadaverine (MDC)  
34 showed dose-dependent inhibition with high-micromolar IC<sub>50</sub> values. In contrast,  
35 neither of the caveolae-mediated endocytosis inhibitors nystatin and filipin inhibited  
36 viral infection. These results suggested that micropinocytosis and CME, instead of  
37 caveolae-mediated endocytosis, are involved in SARS-CoV-2 cell entry. Moreover,

1 apilimod, a phosphoinositide 5-kinase (PIKfyve) inhibitor<sup>29</sup>, showed a low-nanomolar  
2 IC50. Similar effects were observed for two other PIKfyve inhibitors (YM201636 and  
3 APY0201). The acidification inhibitor bafilomycin A1 (Baf.A1) or the TPC2 inhibitor  
4 tetrandrine<sup>30</sup> also significantly diminished viral infection.

5 In STG-visualization system, the cMFI measurements following the CSBT  
6 procedure showed only a slight reduction in cells treated with a high dose of Amiloride,  
7 dynasore, apilimod, and APY0201 (Figure S11A). Notably, confocal-images revealed  
8 that the STG, colocalizing with internalized ACE2-mRuby3, were trapped on enlarged  
9 cytoplasmic vacuoles induced by PIKfyve inhibitors (Figure 6C), and most of these  
10 vacuoles were not stained by pH-dependent LysoView633 dyes, suggesting an  
11 abnormal pH-status (Figure S11B). In addition, tetrandrine or Baf.A1 also caused  
12 marked reductions in colocalization of internalized STG and LysoView633 stain-signals  
13 (Figure S11B), suggested that the two compounds also disturbed STG intracellular  
14 trafficking. For quantitative characterizations of the compound-induced influence on  
15 STG-internalization, the IVNs, IVA and IFR for cells treated with different  
16 concentrations of compounds at 1-hour and 5-hour post probe-loading were calculated.  
17 Apparently, compounds with infection-inhibitory effects correspondingly induced IVNs  
18 reduction or the increase of IVA or IFR (Figure 6D). The SARS-CoV-2 LVpp infection  
19 efficiencies were positively correlated with the IVNs and were negatively correlated  
20 with the IVA and IFR parameters (Figure S12). Overall, the 1-hour IVNs showed the  
21 best correlation with LVpp infection efficiencies ( $r=0.870$ ,  $p<0.001$ ). These results  
22 demonstrated the practical applicability of the STG-visualization system to screen and  
23 characterize compound inhibitors against SARS-CoV-2 cell entry.

24

## 25 Discussion

26 Together, we established a versatile visualization system enables live-cell  
27 visualization of cellular binding, uptake, and intracellular trafficking of SARS-CoV-2 in  
28 virus-free conditions. The innovative system have several advantages over traditional  
29 technology: (i) using a recombinant FP-fused SARS-CoV-2 spike protein as sensor  
30 with little influence on the binding to hACE2 (Figure 1D) and minimal destruction of  
31 antibody-binding epitopes (Figure 4C); (ii) the acid-tolerant GFP-tag (mGam) enables  
32 fluorescent tracking and imaging analysis of dynamic viral entry events, even when it  
33 is internalized into acidic organelles (Figure S11B); (iii) the 293T-ACE2iRb3 cells with  
34 stably expressing ACE2-mRuby3 and H2B-iRFP670, allowing accurate  
35 membrane/nucleus definition and quantitative analysis at the single-cell level; (iiii) one-  
36 step, wash-free and fast detecting procedure (Figure 2D) provides robust settlement  
37 without biosafety concerns for high-throughput screening of neutralization antibodies



1 and compound inhibitors.

2 Our data provided convincing evidence demonstrating the versatile applicability of  
3 the new system. The CSBT-determined entry-blocking potency was a better correlate  
4 of NAT against pseudotyping or the authentic SARS-CoV-2 virus than ELISA-binding  
5 activity in COVID19-convalescent human plasmas, immunized mouse sera and mAbs.  
6 The CSBT may serve as rapid proxy assessment to identify plasma source with  
7 therapeutic potential in clinic, and is a useful tool in evaluating vaccine efficacy and  
8 neutralizing mAb identification. In this study, 4 of 18 mAbs (36H6, 2B4, 3C8 and 12H8,  
9 Figure 4D) with the strongest CSBT blocking activities ( $IC_{50} < 10$  nM) showed the most  
10 potent LVppNAT ( $IC_{90} < 3$  nM). Notably, the 36H6 mAb presented superior  
11 neutralization activity against authentic SARS-CoV-2 ( $IC_{50} = 0.079$  nM), which was  
12 comparable with recently described potent neutralizing mAbs<sup>16, 31</sup>, and thereby  
13 providing an excellent candidate for further development of therapeutic COVID-19  
14 antibody<sup>32</sup>. The 2B4 mAb has cross-neutralization activity for both SARS-CoV-1 and  
15 SARS-CoV-2 and showed binding activity with RaTG13-CoV, suggesting that it  
16 recognize a SARS-CoVs shared neutralizing-epitope. Further identification of such  
17 epitopes recognized by 2B4-like mAbs may facilitate the development of universal  
18 vaccines against SARS-CoV-like viruses<sup>33</sup>.

19 Antibodies can inhibit viral infection via various mechanisms following the steps of  
20 viral cellular entry<sup>34, 35</sup>. The CSBT and CRBT assay in combination with neutralization  
21 test provide a toolbox to distinguish the acting step of antibody neutralization (Figure  
22 5). First, the mAbs (e.g. 36H6) with CRBT activities implying blocking capabilities on  
23 initial viral cell-attachment via hindering RBD-hACE2 interaction. Second, mAbs with  
24 CSBT but no CRBT activity (e.g. 53G2) may inhibit viral infection at post-attachment  
25 endocytic internalization. Third, some mAbs (e.g. 83H7) have neither CRBT nor CSBT  
26 effects and may also neutralize viruses via intracellular pathways when they enter cells  
27 by binding with viral spikes. It is possible that the intracellular antibody may block  
28 conformational changes and/or the requisite interaction between viral spike and host  
29 factor for viral-endolysosomal membrane fusion and/or viral genome release<sup>36</sup>.

30 Furthermore, we developed STG-based high-content analysis system for studying  
31 compound-induced influences on SARS-CoV-2 endocytosis and intracellular  
32 trafficking (Figure 6). Our data revealed both CME and micropinocytosis involve in the  
33 STG entry process, whereas caveolae-mediated endocytosis plays little role. However,  
34 neither the CME nor micropinocytosis inhibitors completely blocked STG  
35 internalization and LVpp infection alone, suggesting that SARS-CoV-2 may use  
36 multiple mechanisms to gain entry into cells. These findings are consistent with  
37 previous studies regarding SARS-CoV-1 cell entry<sup>37</sup>. The profound inhibitory effects

1 of the acidification inhibitor Baf.A1 on both STG internalization and LVpp infection  
2 demonstrated that SARS-CoV-2 cell entry is pH-sensitive. In agreement with findings  
3 from a recent study, the inhibitors against TPC2 and PIKfyve strongly disturbed cell  
4 entry of STG and pseudotyped virus <sup>20</sup>, showing potential drug targets for SARS-CoV-  
5 2 infection.

6 In summary, we developed a versatile tool for live-cell imaging studies of SARS-  
7 CoV-2 cell entry and provided a virus-free high-throughput assay to identify and  
8 characterize neutralizing antibodies and compound inhibitors. The new strategy can  
9 be adapted to develop visualization systems for studies cell entry of different viruses.

10

### 11 **Acknowledgments**

12 This study was supported by National Natural Science Foundation of China  
13 (81993149041 for N.X.; 81902057 for Y.Z.; 81871316 and U1905205 for Q.Y.), the  
14 National Science and Technology Major Project of Infectious Diseases (No.  
15 2017ZX10304402-002-003 for T.C. and No. 2017ZX10202203-009 for Q.Y.), the  
16 National Science and Technology Major Projects for Major New Drugs Innovation and  
17 Development (No. 2018ZX09711003-005-003 for T.C.), the Science and Technology  
18 Major Project of Fujian (2020YZ014001), the Science and Technology Major Project of  
19 Xiamen (3502ZZ2020YJ01) and the Guangdong Basic and Applied Basic Research  
20 Foundation (2020A1515010368 for C.S.). We thank Meng Lai, Wenyuan Liu and Hai  
21 Lin from PerkinElmer for technical assistance in imaging analysis and equipment  
22 maintenance.

23

### 24 **Author contributions**

25 Y.Z., Q.Y., T.C., and N.X. conceptualized the project and designed the experiments.  
26 S.W., M.W., Z.L., S.N., and L.Z. expressed and purified the proteins. YTW., J.X., and  
27 Y.S. performed mouse immunization and developed monoclonal antibodies. Y.Z., J.W.,  
28 J.Y., and L.Y., generated stable cell lines and performed cell imaging studies. Y.Z., H.H.,  
29 J.M., and B.F. constructed plasmids for protein expression and cell experiments. Y.Z.,  
30 H.H., J.W., J.Y., and H.X. performed the pseudovirus neutralization assays. C.S.  
31 performed the neutralization tests against the authentic virus in the P3 laboratory. S.W.,  
32 M.W., and L.Z. performed immunoassays and SPR analyses. Q.Z. performed the cryo-  
33 EM reconstruction. Z.L. collected convalescent patients' blood samples. H.Y. help to  
34 prepare the figures. Y.Z., L.Y., T.C., and Q.Y. integrated the data and wrote the  
35 manuscript. T.Y., L.L. J.H., S.G., Y.C., T.Z. and J.Z. provided critical revision of the  
36 manuscript for important intellectual content. Q.Y., T.C., and N.X. approved the final  
37 version of the manuscript.



1

2 **Competing interests.** The authors declare no competing interests.

3 **Figure legends**

4 **Figure 1. Generation and characterization of FP-fused SARS-CoV-2 S proteins.**

5 (A) Schematics of STG and RBG constructs. Functional domains are colored. NTD, N-  
6 terminal domain; RBD, receptor binding domain; FP, fusion peptide; HR1/2, heptad  
7 repeat 1/2; CH, central helix; TM, transmembrane domain; cyt, cytoplasmic tail; TFd,  
8 T4 fibrin trimerization motif; mGam, monomeric Gamillus; mNG, mNeonGreen. (B)  
9 SDS-PAGE and fluorescence analyses for purified ST-based and RBD-based SARS-  
10 CoV-2 S proteins. (C) Size-exclusion chromatogram (SEC) of the purified SARS-  
11 CoV2-ST, SARS-CoV2-STG and SARS-CoV2-STN. Data from UV280 detector (upper  
12 panel) and fluorescence detector (lower panel) from a G3000 HPLC Column were  
13 showed. The molecular weight of SARS-CoV2-STG (or SARS-CoV2-STN) was about  
14 808 kd, which was calculated according to its elution time in referring to the standard  
15 curve of determining the molecular weight as shown in Figure S2A and S2B. (D) SPR  
16 sensorgrams showing the binding kinetics for SARS-CoV2-STG (upper panel) or  
17 SARS-CoV2-RBG (lower panel) with immobilized rACE2 (human). Colored lines  
18 represented a global fit of the data using a 1:1 binding model.

19

20 **Figure 2. Establishment of the CSBT and CRBT assays.** (A) Schematics of the

21 constructs of ACE2hR and ACE2iRb3 for generations of ACE2-overexpressing cell  
22 lines. EF1 $\alpha$ p, human EF-1 alpha promoter; hACE2, human ACE2; IRES, internal  
23 ribosome entry site; H2BmRb3, H2B-fused mRuby3; BsR, blasticidin S-resistance  
24 gene; 2A, P2A peptide; ins, insulator; hCMVmie, a modified CMV promoter derived  
25 from pEE12.4 vector; hACE2-mRb3, human ACE2 with C-terminal fusing of mRuby3;  
26 H2BiRFP, H2B-fused iRFP670; PuR, puromycin resistance gene. (B) Western blot  
27 analyses of expressions of ACE2 and TMPRSS2 in 293T and H1299 cells stably  
28 transfected with different constructs. NT cell, non-transfected cells. (C) Fluorescence  
29 confocal images of 293T-ACE2iRb3 cells incubated with SARS-CoV2-RBG and  
30 SARS-CoV2-STG for different times. The nucleus H2B-iRFP670 was pseudo-colored  
31 blue. The scale bar was 10  $\mu$ m. (D) Schematic illustration of the procedures of cell-  
32 based high-content imaging assay using fluorescent RBG or STG viral entry sensors.  
33 (E) Dose-dependent fluorescence responses (cMFI) of various probes derived from  
34 different CoVs on 293T-ACE2iRb3 cells. SARS-CoV2-RBD488 was a dylight488-  
35 conjugated SARS-CoV2-RBD protein, and SARS-CoV2-ST488 was a dylight488-  
36 conjugated SARS-CoV2-ST protein. Each probe was tested at 500, 250, 125, 62.5,  
37 and 31.25 nM, respectively. (F) Comparisons of the fluorescence response (cMFI) of

1 various SARS-CoV-2 probes on 293T-ACE2iRb3 cells. For panel E and F, cell images  
2 were obtained for 25 different views for each test, and the data were expressed as  
3 mean $\pm$ SD. (G) Dose-dependent cMFI inhibition of recombinant ACE2, SARS-CoV2-  
4 RBD, and SARS-CoV2-S1 proteins for the binding and uptake of SARS-CoV2-STG  
5 (upper panel) and SARS-CoV2-RBG (lower panel). The experiments were performed  
6 following the procedure as described in panel D. The data were mean $\pm$ SD. CSBT, cell-  
7 based spike function blocking test; CRBT, cell-based RBD function blocking test.

8

9 **Figure 3. Evaluation of neutralization potential of human plasmas from**  
10 **convalescent COVID-19 patients by CSBT and CRBT assays.** (A) Comparisons of  
11 cMFI inhibitions on CSBT and CRBT assays between plasma samples from  
12 convalescent COVID-19 patients and healthy control (HC) subjects. The cMFI  
13 inhibition (%) at 1:20 dilution was plotted at the left Y-axis. The cutoff values for CSBT  
14 and CRBT were inhibition of 25% (median HC value +3.3 $\times$ SD) on cMFI at 1:20 dilution.  
15 (B) Heatmaps showing CSBT and CRBT effects of two-fold serial dilutions of 32  
16 plasmas from convalescent COVID-19 patients. (C) Distributions of the levels of TAb,  
17 IgM, IgG, CSBT, CRBT and LVppNAT of convalescent plasma samples. The numbers  
18 indicated the average titers at log<sub>10</sub>. The titers of Ab, IgM, and IgG were expressed as  
19 relative S/CO values determined by serial dilution measurements of each sample  
20 (maximum reactive dilution fold multiplied by S/CO). The CRBT and CSBT titers were  
21 expresses at ID25, whereas the LVppNAT was expressed as ID50. (D) Correlation  
22 analyses between the CSBT titer and the CRBT efficiency (at 1:20 dilution), the TAb  
23 titer, the IgM titer, the IgG titer, the LVppNAT and the NAT against authentic SARS-  
24 CoV-2 virus among convalescent plasmas. The correlation of CSBT titer and  
25 neutralization activity against authentic SARS-CoV-2 virus in 12 representative  
26 samples (included 11 convalescent COVID-19 plasmas and 1 control sample).

27

28 **Figure 4. Phenotypic characterization of mAbs against by the CSBT and CRBT**  
29 **assays.** (A) Fluorescence images for evaluations of inhibition effects of two  
30 representative mAbs (23B1 and 2B4) in tests of CRBT (SARS-CoV2-RBG and SARS-  
31 CoV1-RBG), CSBT (SARS-CoV2-STG) and LVppNAT (SARS-CoV-2). Scale bar, 500  
32  $\mu$ m. (B) CSBT titrations of mAbs to determine their inhibitory activities in blocking the  
33 SARS-CoV2-STG internalization. (C) Heatmaps showing dose-dependent inhibitory  
34 effects of mAbs on cell-based functional blocking tests using the probes of SARS-  
35 CoV2-STG, SARS-CoV2-ST488, SARS-CoV2-RBG and SARS-CoV1-RBG. The  
36 affinity data of mAbs to SARS-CoV2-RBD and the epitope binning cluster of the mAbs  
37 were shown on the left side of the pictures. (D) Comparison of potencies of mAbs

1 determined by various cell-based functional assays (CSBT, CRBT, and LVppNAT) and  
2 ELISA or SPR-based binding assays. Red arrows indicated 4 mAbs (36H6, 2B4, 3C8  
3 and 12H8) with the strongest CSBT blocking activities ( $IC_{50} < 10$  nM) and potent  
4 neutralization activities ( $IC_{90} < 3$  nM). A blue arrow indicated the 53G2 mAb which had  
5 CSBT but no CRBT activity. A purple arrow indicated the 83H7 mAb which had  
6 neutralization activity but showed neither CSBT nor CRBT inhibition. (E) Correlation  
7 between the CSBT- $IC_{50}$  and the LVppNAT- $IC_{90}$  (left panel) or CRBT- $IC_{50}$  (right panel)  
8 of mAbs involved in this study. The 36H6, 2B4, 3C8 and 12H8 mAbs showing an  
9 LVppNAT- $IC_{90} < 3$  nM and a CSB- $IC_{50} < 10$  nM were plotted as distinct red dots. The  
10 83H7 mAb was plotted as a purple dot in left panel, and the 53G2 mAb was plotted as  
11 a blue dot in right panel.

12

13 **Figure 5. The 83H7 mAb inhibits SARS-CoV-2 via the intracellular neutralization**  
14 **pathway.** The 293T-ACE2iRb3 cells were incubated with 20 nM of dylight633-labeled  
15 mAbs (Ab633) of 36H6, 53G2, 83H7, and 8H6 and an irrelevant control antibody  
16 (ctrAb), in the presence or absence of STG (2.5 nM). Live-cell fluorescence image  
17 dynamically tracked using a 63x water immersion objective. Five replicate wells were  
18 measured for each group, and 16 fields of each well were imaged. Time-series (at 10-  
19 min, 1-hour, 2-hour, 3-hour, 5-hour, 7-hour, 9-hour, 11-hour, and 13-hour) analyses of  
20 the STG-IVNs (A), STG-IVpMFI (B), Ab633-IVNs (C), Ab633-IVpMFI (D) and the  
21 percentage of STG/Ab633 colocalized vesicles to total internalized STG vesicles (E).  
22 IVNs, average internalized vesicle numbers; IVpMFI, the average peak MFI of  
23 internalized vesicles. (F) Comparisons of the STG-IVA of the internalized STG vesicles  
24 among groups co-incubated with various mAbs at 5-hour post-incubation. \*\* indicates  
25  $p < 0.01$ ; IVA, average area ( $px^2$ ) of internalized STG vesicles. (G) Confocal images of  
26 STG (green channel), Ab633 (red channel), and ACE2-mRuby3 (white channel) in  
27 293T-ACE2iRb3 cells at 5-hour post STG/Ab633 co-incubation. Scale bar, 20  $\mu m$ .

28

29 **Figure 6. Detection of compound-induced influence on SARS-CoV-2 S-mediated**  
30 **cellular entry.** (A) Schematic summary of the possible mechanisms of 11 compound  
31 inhibitors involved in the study. CytD, cytochalasin D; MDC, dansylcadaverine; Baf.A1,  
32 bafilomycin A1; vRNA, viral RNA. (B) Dose-dependent inhibitions of 11 compounds  
33 against SARS-CoV-2 LVpp infection on H1299-ACE2hR cells. All compounds were  
34 tested in a 2-fold dilution series, and the initial drug concentrations were begun at their  
35 maximal non-cytotoxic concentrations. The initial concentrations were 200  $\mu M$  for  
36 amiloride, MDC and DMSO (as a solvent control); 100  $\mu M$  for dynasore; 10  $\mu M$  for  
37 filipin, APY0201, YM201636 and tetrandrine; 4  $\mu M$  for nystatin; 100 nM for Baf.A1 and

1 apilimod. ND, not detected. (C) Confocal images of STG (green channel), ACE2-  
2 mRuby3 (red channel), and nucleus (blue channel) in 293T-ACE2iRb3 cells at 5-hour  
3 post STG incubation. The cells were pretreated with compounds for 1-hour before STG  
4 loading. These pictures were obtained by using Leica gSTED confocal microscopy on  
5 cells treated with compounds at their respective initial concentrations as above-  
6 mentioned. Scale bar, 10  $\mu\text{m}$ . (D) Quantitative analysis of the influence of entry  
7 inhibitors on STG internalization. Dose-dependent influence of various compounds on  
8 STG internalization characteristics on 293T-ACE2iRb3 cells at 1-hour (left panels) and  
9 5-hour (right panels) after incubation. All compounds were tested in a 4-fold dilution  
10 series (4 gradients for DMSO control, and 5 gradients for others), and the initial drug  
11 concentrations were identical with as (B). Three replicate wells were measured for  
12 each group, and 16 fields of each well were imaged. For each compound, 5 colored  
13 bars from left-to-right orderly displayed the values measured from cells treated with 4-  
14 fold serial high-to-low concentrations of compounds. STG-IFR, internalized STG  
15 fluorescence intensity ratio; STG-IVA, average area ( $\mu\text{m}^2$ ) of internalized STG vesicles;  
16 STG-IVNs, average numbers of internalized STG vesicles per cell; \*,  $p < 0.05$ .

17

## 18 **Methods**

### 19 **Plasmas of convalescent COVID-19 patients**

20 Plasma samples of a total of 32 convalescent COVID-19 patients were involved  
21 in this study. All of these patients were confirmed COVID-19 cases, and their samples  
22 were collected after they were discharged from the first hospital of Xiamen University.  
23 The study was approved by the institutional review board of the School of Public Health  
24 in accordance with the Declaration of Helsinki, and written informed consent was  
25 obtained. The characteristics of the patients and their samples were presented in Table  
26 S1.

### 27 **Cell lines**

28 The cell lines of 293T, H1299, H1299-ACE2hR, 293T-ACE2hR and 293T-  
29 ACE2iRb3 were Dulbecco's modified Eagle medium (Sigma, D6429) supplemented  
30 with 10% fetal bovine serum (Thermo Scientific, 10099-141), 0.1 mM non-essential  
31 amino acids (Thermo Scientific, 1140-050), and were incubated at 37°C and 5% CO<sub>2</sub>  
32 in a humidified incubator. To ensure the stable expression of transfected constructs in  
33 cells, the culture medium was supplemented with blasticidin (10  $\mu\text{g}/\text{mL}$ ) for H1299-  
34 ACE2hR and 293T-ACE2hR, and was supplemented with puromycin (1  $\mu\text{g}/\text{mL}$ ) for  
35 293T-ACE2iRb3, respectively. The ExpiCHO-S cells were cultured with ExpiCHO™  
36 Expression Medium (Thermo Scientific) in stackable CO<sub>2</sub> incubator shaker.

## 1 **Mammalian cell expression vectors and lentiviral vectors**

2 For mammalian cell expression, two modified PiggyBac (PB) transposon vectors  
3 (MIHIPsMie and EIRBsMie) were constructed based on PB-CMV-MCS-EF1 $\alpha$ -RedPuro  
4 (System Biosciences, PB514B2). The fragment of CMV-MCS-EF1 $\alpha$ -RedPuro on this  
5 vector was removed by SfiI/ApaI digestion. The DNA fragment of hCMVmie-MCS-  
6 IRES-H2BiRFP670-P2A-Puro-BGH and hCMVmie-MCS-IRES-H2BmRuby3-P2A-  
7 BsR-BGH were synthesized (Generalbiol, Anhui, China) and were ligated into the  
8 parental PB vector to generate the MIHIPsMie vector and EIRBsMie vector,  
9 respectively. The hCMVmie is an optimized CMV promoter with synthetic intron and is  
10 derived from pEE12.4 vector (Lonza). The iRFP670 is a near-infrared fluorescent  
11 protein with the excitation/emission maxima at 643 nm/670 nm<sup>38</sup>. The mRuby3 is an  
12 improved red fluorescent protein with the excitation/emission maxima at 558 nm/592  
13 nm<sup>39</sup>.

14 The codon-optimized RBD gene of SARS-CoV-2 (referring to MN908947.3) was  
15 obtained by primer-annealing, following a PCR reaction for introductions of an N-  
16 terminal B2M leader sequence and a C-terminal polyhistidine sequence. Human  
17 codon-optimized DNA encoding the fluorescent proteins of Gamillus, mNeonGreen,  
18 and the full-length encoding genes of SARS-CoV-2 (GenBank: MN908947.3) and  
19 RaTG13-CoV (GISAID: EPI\_ISL\_402131) were synthesized (Generalbiol, Anhui,  
20 China). The encoding genes of spike proteins of SARS-CoV-1, MERS-CoV, and HKU1-  
21 CoV were purchased from Sino Biological Inc. The expression vectors for SARS-  
22 CoV1-RBG, RaTG13-RBG, HKU1-RBG, MERS-RBG, SARS-CoV2-RBN, SARS-  
23 CoV2-RBD, SARS-CoV2-STG, SARS-CoV2-STN, SARS-CoV2-ST, and SARS-CoV2-  
24 SMG were constructed as the frame structure described in Figure 1A and cloned into  
25 the EIRBsMie vector, via using NEBuilder HiFi DNA Assembly Master Mix (New  
26 England Biolabs).

27 For lentiviral vectors, the pLVEF1 $\alpha$ HRB-ACE2hR and pLVEF1 $\alpha$ mNG vectors  
28 were constructed on the pLV-EF1 $\alpha$ -MCS-IRES-Bsd vector (Youbio, VT8179). The  
29 ACE2 cDNA fragment (Sino Biological, HG10108-ACG) linking with an IRES-  
30 H2BmRuby3-P2A-BsR DNA fragment (synthesized by Generalbiol, Anhui, China) was  
31 cloned in-frame into the XbaI/SalI sites of pLV-EF1 $\alpha$ -MCS-IRES-Bsd to obtain the  
32 pLVEF1 $\alpha$ HRB-ACE2hR vector.

## 33 **Recombinant proteins**

34 Recombinant expressions of proteins involved in this study were performed by  
35 using the ExpiCHO<sup>TM</sup> expression system (Thermo Scientific, A29133). Briefly,  
36 plasmids encoding targeted proteins were transiently transfected into ExpiCHO-S cells  
37 by using ExpiFectamine<sup>TM</sup> CHO transfection kit (Thermo Scientific, A29129).



1 Transfected cells were cultured in stackable CO<sub>2</sub> incubator shaker (Kühner AG,  
2 SMX1503C). Cultures were harvested 5-7 days after transfection, and the cell-free  
3 supernatants were obtained by centrifugation and filtration with a 0.22 µm filter.  
4 Subsequently, the proteins in supernatants were captured by Ni Sepharose Excel resin,  
5 followed a wash with PBS buffer (20 mM PB7.4, 150 mM NaCl) containing 30 mM  
6 imidazole. Purified proteins were collected via a further elution with PBS buffer  
7 containing 250 mM imidazole, and were exchanged into the imidazole-free PBS buffer.

#### 8 **Characterization of recombinant proteins by PAGE and SEC**

9 Purified proteins were submitted to SDS-PAGE using SurePAGE (Genscript).  
10 Fluorescence detection in gel electrophoresis (Figure S1A) was performed using 1%  
11 agarose gel in 1x TAE buffer. Fluorescent gel image was acquired in FUSION FX7  
12 Spectra multispectral imaging system (VILBER). The size exclusion liquid  
13 chromatography (SEC) for the SARS-CoV2-ST, SARS-CoV2-STG, and SARS-CoV2-  
14 STN proteins were performed using a high-performance liquid chromatography system  
15 (Waters Acquity UPLC) on a TSKgel G3000PWXL column. A gel filtration calibration  
16 HMW kit (GE health) was used for molecular weight calculation.

#### 17 **Cryo-EM sample preparation, data collection, and processing**

18 Aliquots (3 µL) of purified proteins of SARS-CoV2-ST or SARS-CoV2-STN were  
19 loaded onto glow-discharged (60 s at 20 mA) holey carbon Quantifoil grids (R2/1, 200  
20 mesh, Quantifoil Micro Tools) using a Vitrobot Mark IV (ThermoFisher Scientific) at 100%  
21 humidity and 4°C. Data were acquired using the EPU software to control an FEI Tecnai  
22 F30 transmission electron microscope (Thermo Scientific) operated at 300 kV and  
23 equipped with a ThermoFisher Falcon-3 direct electron detector. Images were  
24 recorded in the 39-frames movie mode at a nominal magnification of 93,000X with a  
25 pixel size of 1.12 Å. The total electron dose was set to 30 e<sup>-</sup>Å<sup>-2</sup> and the exposure time  
26 was 1s. Micrographs were collected with a defocus range comprised between 1.0 and  
27 3.5 µm. Movie frame alignment and contrast transfer function estimation of each  
28 aligned micrograph were carried out with the programs Motioncor<sup>40</sup> and GCTF<sup>41</sup>.  
29 Particle picking, two rounds of reference-free 2D classification and final 3D  
30 reconstruction were performed by the programs cryoSPARC v2<sup>42</sup>. Density-map-based  
31 visualization and segmentation were performed with Chimera<sup>43</sup>.

#### 32 **Generation and production of antibodies against SARS-CoV-2 S.**

33 Balb/c mice were intraperitoneal immunized with 5 µg of SARS-CoV2-RBD  
34 (expression in this study, n=5), SARS-CoV2-S1 (Sino Biological, 40591-V08H, n=3)  
35 and SARS-CoV2-S2 (Sino Biological, 40590-V08B, n=3), respectively. The proteins  
36 were emulsified in aluminum adjuvant for immunization. Triple immunizations were  
37 performed at week 0, 2, and 4. Two-week after immunization completion, mouse serum

1 samples were collected for analyses as shown in Figure S4.

2 The mAbs against RBD of SARS-CoV-2 were raised in Balb/c mice using an  
3 injection 200 µg of SARS-CoV2-RBD protein emulsified in Freund's complete adjuvant,  
4 followed by an intravenous booster injection of 200 µg of protein emulsified in Freund's  
5 incomplete adjuvant at 2-week later, as previously described. The resulting  
6 hybridomas were screened for the secretion of RBD-specific mAbs using an indirect  
7 ELISA. The reactive cell clones were cultured in 75-cm<sup>2</sup> flasks. Monoclonal cells that  
8 produced mAbs were obtained by limiting dilution at least three times. In this study, a  
9 total of 18 mAb-producing hybridomas were finally obtained. The mAbs were produced  
10 and purified as previously described <sup>44</sup>.

### 11 **Enzyme-linked immunosorbent assay and western blots**

12 The titers of TAb, IgG, and IgM against SARS-CoV-2 of human blood samples  
13 were detected by commercial enzyme-linked immunosorbent assay (ELISA) kits  
14 provided by Beijing Wantai Biological Pharmacy Enterprise Co.,Ltd. The  
15 measurements were performed according to the manufacturer's instructions. The TAb-  
16 ELISA kit is based on recombinant viral antigen using a double-sandwich reaction form.  
17 The IgG kit is an indirect ELISA assay, and the IgM kit is based on the µ-chain capture  
18 method. All three assays used recombinant SARS-CoV-2 RBD antigens. The samples  
19 were initially tested undiluted, and the positive samples with the signal to a cutoff ratio  
20 (S/CO)  $\geq 10$  were further diluted (1:10, 1:100, 1:1,000 and 1:10,000) by PBS buffer  
21 containing 20% newborn bovine serum (NBS) and tested again. The titers for TAb, IgG,  
22 and IgM antibody were calculated via S/CO multiplied by the maximum dilution factors.

23 To determine the ELISA binding activities of mAb to immobilized SARS-CoV2-  
24 RBD and SARS-CoV2-ST (Figure S5A), ELISA plates were coated with viral proteins  
25 at 200 ng per well, and nonspecific binding was blocked with phosphate-buffered saline  
26 (PBS) that contained 10% NBS, 0.5% casein (Sigma) and 10% sucrose. A series of 3-  
27 fold series dilutions that ranged from 10,000 ng/mL to 0.056 ng/mL for each mAb were  
28 prepared. For the test, 100 µl of specimens were added to the reaction well and  
29 incubated for 60-min at 37°C, followed by washing and reaction with horseradish  
30 peroxidase (HRP)-conjugated anti-mouse pAb (Wantai, Beijing, China). After a further  
31 30-min incubation, the plates were washed with PBST buffer (20 mM PB7.4, 150 mM  
32 NaCl and 0.05% Tween 20) five times. The TMB chromogen solution (100 µL per well)  
33 was then added to the wells, and the plates were further incubated for 15-min.  
34 Subsequently, the reaction was stopped by adding 50 µL of 2 M H<sub>2</sub>SO<sub>4</sub>, and the OD  
35 was measured at 450 nm against 630 nm (OD<sub>450-630</sub>) by a microplate reader.

36 Epitope binning assays for mAbs (Figure S5B) were based on cELISA  
37 experiments. In brief, 96-well microplates were coated with SARS-CoV2-RBD at 200



1 ng per well. Aliquots of competitor mAbs (50  $\mu$ L, 10  $\mu$ g per well) and HRP-conjugated  
2 mAbs (50  $\mu$ L, 10  $\mu$ g per well) were added to the wells. The sample-loaded microplate  
3 was incubated at 37 °C for 1-hour. Then the microplate was washed five times with  
4 PBST buffer following the TMB chromogen solution addition. After a 15-min incubation,  
5 50  $\mu$ L of 2 M H<sub>2</sub>SO<sub>4</sub> was added to stop the reaction, and the OD<sub>450-630</sub> was measured.  
6 The inhibition ratio (%) was quantitatively assessed by comparing OD<sub>450-630</sub> obtained  
7 with HRP-mAb in the presence or absence of competitor mAbs. A reduction of >70%  
8 was considered as an effective inhibition. The mAb clusters were generated based on  
9 the inhibition data by using HemI software <sup>45</sup>.

10 Commercial antibodies were used to detect intracellular ACE2 (Sino Biological,  
11 10108-T56), TMPRSS2 (Abcam, ab92323), and GAPDH (Proteintech, HRP-60004)  
12 according to the manufacturer's instructions. The blots were imaged using FUSION  
13 FX7 Spectra multispectral imaging system (VILBER).

#### 14 **Affinity determination and competition experiments using SPR**

15 For determinations of the binding affinities of SARS-CoV2-RBG and SARS-CoV2-  
16 STG to hACE2 (Figure 1D), rACE2 (mouse-Fc tagged, Sino Biological) proteins were  
17 immobilized to a protein A sensorchip a level of ~500 response units (RUs) using  
18 Biacore 8000 (GE Healthcare) and a running buffer of composed of 20mM PB7.4 with  
19 300 mM NaCl. Serial dilutions of purified SARS-CoV2-RBG and SARS-CoV2-STG  
20 proteins were injected ranging in concentration from 200 to 3.13 nM. To measure the  
21 affinities of mAbs to RBD proteins (Figure S6 and S10), various mAbs were loaded  
22 onto a protein A sensorchip to a level of ~1000 RUs and a running buffer of 20mM  
23 PB7.4. Serial dilutions of proteins (SARS-CoV2-RBD, SARS-CoV1-RBG or RaTG13-  
24 RBG) were injected ranging in concentration from 200 to 0.19 nM. The response data  
25 were fit to a 1:1 binding model using Biacore™ Insight evaluation software (GE  
26 Healthcare). For Fab competition experiments (Figure S8), rACE2 protein was loaded  
27 onto a protein A sensorchip at 200 nM. Subsequently, the SARS-CoV2-RBD protein  
28 (200 nM) were loaded to bind with rACE2 in the presence of 2-fold serial dilutions of  
29 various Fabs in concentration from 800 nM to 0 nM.

#### 30 **Neutralization assays against pseudotyped and authentic virus**

31 The SARS-CoV-2 and SARS-CoV-1 LVpp productions and LVppNAT  
32 measurements for blood samples and antibodies were performed as previously  
33 described <sup>46</sup>. For determinations of compound-mediated inhibition for SARS-CoV-2  
34 LVpp infection, the plated H1299-ACE2hR cells were pretreated with serial dilutions of  
35 compounds for 1-hour and then were incubated with LVpp inoculum (0.5 TU/cell). The  
36 cells were further cultured for 36-hour in the presence of compounds. Then the

1 fluorescent imaging analysis and IC50 calculations were based on the infection-  
2 inhibition ratio of serial dilutions and determined by the 4-parameter logistic (4PL)  
3 regression using GraphPad Prism v8.0. Neutralization activities of COVID-19-  
4 convalescent human plasmas and mAbs against authentic SARS-CoV-2 virus were  
5 detected as previously described<sup>25</sup>. Briefly, 2-fold serial dilutions of plasma samples  
6 (from 1:10 to 1:10240) and mAbs (from 100 µg/mL to 0.763 ng/mL) were prepared and  
7 incubated with 100 times the tissue culture infective dose (TCID50) of the  
8 BetaCoV/Shenzhen/SZTH-003/2020 strain virus (GISAID access number:  
9 EPI\_ISL\_406594) at 37°C for 1-hour. The mixtures were then added to a monolayer of  
10 Vero cells (10<sup>4</sup> cells per well, pre-washed twice with PBS) in a 96-well plate and  
11 incubated at 37°C. Microscopic examinations were performed for the cytopathic effect  
12 after 5-day incubation. The complete absence of cytopathic effect in an individual  
13 culture well was defined as protection. The ID50 (for plasma samples) or IC50 (for  
14 mAbs) were calculated using GraphPad Prism.

#### 15 **Cell imaging assays**

16 For direct visualizing the cellular binding and uptake of RBD or spike proteins, the  
17 293T-ACE2iRb3 cells were seeded at 2×10<sup>4</sup> cells per well in poly-D-lysine pretreated  
18 CellCarrier-96 Black plate. After 1-day culture, the fluorescent probes (ensure a final  
19 concentration of 25 nM for RBD based protein probes or 2.5 nM for ST based protein  
20 probes in culture medium) were added to the cell cultures. In experiments of Figure  
21 2B, the cells were cultured at 37°C in CO2 incubator for 0, 6, 30, 60, and 120 –min,  
22 and were gently washed twice with PBS following a paraformaldehyde fixation. The  
23 images of Figure 2B were acquired on TCS SP8 STED confocal microscope (Leica  
24 Microsystems) using a 100x oil immersion objective. In experiments of Figure S3A-D,  
25 the cell culture plate (after probe loading, in live-cell and wash-free conditions) was  
26 placed in a pre-heated (37°C) Opera Phenix with 3% CO2. Multi-channel fluorescence  
27 (STG or RBG, Ex:488/Em:525; ACE2-mRuby3, Ex:561/Em:590; H2BiRFP670,  
28 Ex:640/Em670) cell images were acquired every 6-min (0 to120-min). In experiments  
29 of Figure 2D-F, cell images were acquired (Opera Phenix) at 1-hour after probe loading  
30 in wash-free and live-cell conditions.

31 For CSBT and CRBT assays, blood samples or mAbs were pre-made as 2-fold  
32 serial dilutions using DMEM containing 10% FBS. Aliquots (44 µL per well) of diluted  
33 samples and protein probes (11 µL per well) were mixed in a 96-well plate with U  
34 shaped bottom. Half of the culture medium (50 µL) of 293T-ACE2iRb3 cell plate was  
35 gently removed, and 50 µL of sample/probe mixtures were added to each well. Cell  
36 image acquisitions performed with Opera Phenix (green, red and near-infrared

1 channels in confocal mode) using a 20x water immersion objective at 1-hour after  
2 probe incubation in wash-free and live-cell conditions.

3 In simultaneous tracking of STG and mAbs (Figure 5), the 293T-ACE2iRb3 cells  
4 in CellCarrier-96 Black plate were pre-stained with NucBlue before the incubations of  
5 mAbs and STG. Subsequently, aliquots (10  $\mu$ L) of dylight633-labeled mAbs of 36H6,  
6 53G2, 83H7, 8H6 and ctrAb (to achieve a final concentration of 20 nM) with 2.5 nM (a  
7 final concentration in culture medium) of STG probe (10  $\mu$ L) or not, were added into to  
8 the wells, respectively. The plate was immediately placed in a pre-heated (37°C) Opera  
9 Phenix with 3% CO<sub>2</sub>. Time-serial four-channel (NucBlue: Ex:405/Em:450; STG or  
10 RBG, Ex:488/Em:525; ACE2-mRuby3, Ex:561/Em:590; H2BiRFP670, Ex:640/Em670)  
11 live-cell images were acquired at 10-min, 1-hour, 2-hour, 3-hour, 5-hour, 7-hour, 9-hour,  
12 11-hour, and 13-hour using a 63x water immersion objective.

13 To visualize compound-induced influence on viral entry, 293T-ACE2iRb3 (Figure  
14 6C-D, Figure S11A) or H1299-ACE2hR cells (Figure S11B) were pretreated with serial  
15 dilutions of compounds for 1-hour. Then the probes were added to the cell cultures for  
16 further incubations in the presence of compounds. Cell images shown in Figure 6C  
17 and Figure S11B were acquired on TCS SP8 STED confocal microscope using a 100x  
18 oil immersion objective. The data of Figure 6D and Figure S11A were derived from  
19 images acquired on Opera Phenix using 40x water immersion objective. For pictures  
20 of Figure 6C, the cells were gently washed twice with PBS at 5-hour post STG  
21 incubation, following a paraformaldehyde fixation before imaging. For experiments as  
22 shown in Figure S11B, the cells at 5-hour post STG incubation were stained with  
23 Lysoview633 (0.1  $\mu$ L per well) for 10-min, then the cells were gently washed twice with  
24 PBS buffer and fixed with paraformaldehyde treatment before imaging. Cell images  
25 involved in Figure 6D and Figure S11A were acquired in wash-free and live-cell  
26 conditions, at different various time points as indicated in their legends.

### 27 **Quantitative image analyses**

28 All quantitative image analyses were based on images acquired by Opera Phenix,  
29 following a schematic flow chart shown in Figure 2D. All image data were transfer to  
30 Columbus system (version 2.5.0, PerkinElmer Inc) for analysis. Multiparametric image  
31 analysis was performed as described in the following. The signals of the blue channel  
32 (NucBlue, only for Figure 5) or near-infrared channel (H2BiRFP, for other data) were  
33 used to detect the nucleus. As the ACE2 is a membrane protein, the signals of ACE2-  
34 mRuby3 (red channel) were used to determine the cell boundary. Then, the cells were  
35 further segment into the regions of membrane (outer border: 0%, inner border: 15%),  
36 cytoplasm (outer border: 20%, inner border: 45%), and nucleus (outer border: 55%,  
37 inner border: 100%). For CSBT and CRBT assays, the MFI of probe channel

1 (Ex488/Em525) in the cytoplasmic region (cMFI). The MFI of ACE2-mRuby3  
2 (Ex561/Em590) on the membrane were also calculated for inter-well normalization.  
3 The cMFI inhibition ratio (%) of the test sample was calculated using the following  
4 equation:  $[(\text{cMFI}_{\text{pc}} - \text{cMFI}_{\text{tst}}) / (\text{cMFI}_{\text{pc}} - \text{cMFI}_{\text{blk}})] \times 100\%$ . In this formula, the  $\text{cMFI}_{\text{pc}}$  is the  
5 cMFI value of probe-only well (as positive control), the  $\text{cMFI}_{\text{tst}}$  is the cMFI value of test  
6 well, and the  $\text{cMFI}_{\text{blk}}$  is the cMFI value of cell-only well. For each plate, five replicates  
7 of probe-only well and one cell-only well were included. The CSBT and CRBT activities  
8 of mAbs were expressed as IC50, and that of blood samples were expressed as ID50.  
9 The ID50/IC50 values were determined by 4PL regression GraphPad Prism v8.0. To  
10 determine the internalization characteristics, the parameters of IFR, IVNs, IVpMFI, and  
11 IVA were measured. Among these parameters, the IFR is the ratio of intensity in the  
12 cytoplasmic region and in the whole cell, the IVNs is the average numbers (per cell) of  
13 internalized fluorescent vesicles, the IVpMFI is the average peak MFI of internalized  
14 fluorescent vesicles, and the IVA is the average area of internalized fluorescent  
15 vesicles. The detailed algorithms for the above-mentioned imaging analyses using  
16 Columbus system are available from the corresponding authors on request.

## 17 **Statistical analysis**

18 The unpaired t-test of variance was used to compare continuous variables. Linear  
19 regression models and Pearson correlation tests were used for correlation analyses.  
20 Two-way ANOVA tests were used to analysis the time-serial observations for  
21 independent variable. Differences were considered significant at a two-tailed  $p < 0.05$ .  
22 GraphPad Prism version 8.0.1 was used for all statistical calculations.

23

## 24 **References**

- 25 1. Li, Q. et al. Early Transmission Dynamics in Wuhan, China, of Novel Coronavirus-  
26 Infected Pneumonia. *N Engl J Med* **382**, 1199-1207 (2020).
- 27 2. Zhou, P. et al. A pneumonia outbreak associated with a new coronavirus of probable  
28 bat origin. *Nature* **579**, 270-273 (2020).
- 29 3. Peiris, J.S. et al. Coronavirus as a possible cause of severe acute respiratory syndrome.  
30 *Lancet* **361**, 1319-1325 (2003).
- 31 4. Zaki, A.M., van Boheemen, S., Bestebroer, T.M., Osterhaus, A.D. & Fouchier, R.A.  
32 Isolation of a novel coronavirus from a man with pneumonia in Saudi Arabia. *N Engl J*  
33 *Med* **367**, 1814-1820 (2012).
- 34 5. Marsh, M. & Helenius, A. Virus entry: open sesame. *Cell* **124**, 729-740 (2006).
- 35 6. Amanat, F. & Krammer, F. SARS-CoV-2 Vaccines: Status Report. *Immunity* **52**, 583-  
36 589 (2020).
- 37 7. Cho, N.J. & Glenn, J.S. Materials science approaches in the development of broad-  
38 spectrum antiviral therapies. *Nat Mater* (2020).
- 39 8. Mazzon, M. & Marsh, M. Targeting viral entry as a strategy for broad-spectrum antivirals.

- 1 *F1000Res* **8** (2019).
- 2 9. Wrapp, D. et al. Cryo-EM structure of the 2019-nCoV spike in the prefusion  
3 conformation. *Science* **367**, 1260-1263 (2020).
- 4 10. Walls, A.C. et al. Structure, Function, and Antigenicity of the SARS-CoV-2 Spike  
5 Glycoprotein. *Cell* **181**, 281-292 e286 (2020).
- 6 11. Hoffmann, M., Kleine-Weber, H. & Pohlmann, S. A Multibasic Cleavage Site in the  
7 Spike Protein of SARS-CoV-2 Is Essential for Infection of Human Lung Cells. *Mol Cell*  
8 **78**, 779-784 e775 (2020).
- 9 12. Hoffmann, M. et al. SARS-CoV-2 Cell Entry Depends on ACE2 and TMPRSS2 and Is  
10 Blocked by a Clinically Proven Protease Inhibitor. *Cell* **181**, 271-280 e278 (2020).
- 11 13. Yan, R. et al. Structural basis for the recognition of SARS-CoV-2 by full-length human  
12 ACE2. *Science* **367**, 1444-1448 (2020).
- 13 14. Shang, J. et al. Cell entry mechanisms of SARS-CoV-2. *Proc Natl Acad Sci U S A* **117**,  
14 11727-11734 (2020).
- 15 15. Gao, Q. et al. Rapid development of an inactivated vaccine candidate for SARS-CoV-  
16 2. *Science* (2020).
- 17 16. Cao, Y. et al. Potent neutralizing antibodies against SARS-CoV-2 identified by high-  
18 throughput single-cell sequencing of convalescent patients' B cells. *Cell* (2020).
- 19 17. Xia, S. et al. Inhibition of SARS-CoV-2 (previously 2019-nCoV) infection by a highly  
20 potent pan-coronavirus fusion inhibitor targeting its spike protein that harbors a high  
21 capacity to mediate membrane fusion. *Cell Res* **30**, 343-355 (2020).
- 22 18. Lei, C. et al. Neutralization of SARS-CoV-2 spike pseudotyped virus by recombinant  
23 ACE2-Ig. *Nat Commun* **11**, 2070 (2020).
- 24 19. Dai, L. et al. A Universal Design of Betacoronavirus Vaccines against COVID-19, MERS,  
25 and SARS. *Cell* (2020).
- 26 20. Ou, X. et al. Characterization of spike glycoprotein of SARS-CoV-2 on virus entry and  
27 its immune cross-reactivity with SARS-CoV. *Nat Commun* **11**, 1620 (2020).
- 28 21. Xiong, H.-L. et al. Robust neutralization assay based on SARS-CoV-2 S-bearing  
29 vesicular stomatitis virus (VSV) pseudovirus and ACE2-overexpressed BHK21 cells.  
30 *bioRxiv* (2020).
- 31 22. Nie, J. et al. Establishment and validation of a pseudovirus neutralization assay for  
32 SARS-CoV-2. *Emerg Microbes Infect* **9**, 680-686 (2020).
- 33 23. Shinoda, H. et al. Acid-Tolerant Monomeric GFP from *Olindias formosa*. *Cell Chem Biol*  
34 **25**, 330-338 e337 (2018).
- 35 24. Shaner, N.C. et al. A bright monomeric green fluorescent protein derived from  
36 *Branchiostoma lanceolatum*. *Nat Methods* **10**, 407-409 (2013).
- 37 25. Shen, C. et al. Treatment of 5 Critically Ill Patients With COVID-19 With Convalescent  
38 Plasma. *JAMA* (2020).
- 39 26. Duan, K. et al. Effectiveness of convalescent plasma therapy in severe COVID-19  
40 patients. *Proc Natl Acad Sci U S A* **117**, 9490-9496 (2020).
- 41 27. Casadevall, A. & Pirofski, L.A. The convalescent sera option for containing COVID-19.  
42 *J Clin Invest* **130**, 1545-1548 (2020).
- 43 28. Bai, Y. et al. Intracellular neutralization of viral infection in polarized epithelial cells by  
44 neonatal Fc receptor (FcRn)-mediated IgG transport. *Proc Natl Acad Sci U S A* **108**,

- 1 18406-18411 (2011).
- 2 29. Gayle, S. et al. Identification of apilimod as a first-in-class PIKfyve kinase inhibitor for  
3 treatment of B-cell non-Hodgkin lymphoma. *Blood* **129**, 1768-1778 (2017).
- 4 30. Sakurai, Y. et al. Ebola virus. Two-pore channels control Ebola virus host cell entry and  
5 are drug targets for disease treatment. *Science* **347**, 995-998 (2015).
- 6 31. Rogers, T.F. et al. Isolation of potent SARS-CoV-2 neutralizing antibodies and  
7 protection from disease in a small animal model. *Science* (2020).
- 8 32. Marovich, M., Mascola, J.R. & Cohen, M.S. Monoclonal Antibodies for Prevention and  
9 Treatment of COVID-19. *JAMA* (2020).
- 10 33. Pinto, D. et al. Cross-neutralization of SARS-CoV-2 by a human monoclonal SARS-  
11 CoV antibody. *Nature* (2020).
- 12 34. Pierson, T.C. & Diamond, M.S. Molecular mechanisms of antibody-mediated  
13 neutralisation of flavivirus infection. *Expert Rev Mol Med* **10**, e12 (2008).
- 14 35. Yamauchi, Y. & Helenius, A. Virus entry at a glance. *J Cell Sci* **126**, 1289-1295 (2013).
- 15 36. Burkard, C. et al. Coronavirus cell entry occurs through the endo-/lysosomal pathway  
16 in a proteolysis-dependent manner. *PLoS Pathog* **10**, e1004502 (2014).
- 17 37. Wang, H. et al. SARS coronavirus entry into host cells through a novel clathrin- and  
18 caveolae-independent endocytic pathway. *Cell Res* **18**, 290-301 (2008).
- 19 38. Shcherbakova, D.M. & Verkhusha, V.V. Near-infrared fluorescent proteins for multicolor  
20 in vivo imaging. *Nat Methods* **10**, 751-754 (2013).
- 21 39. Bajar, B.T. et al. Improving brightness and photostability of green and red fluorescent  
22 proteins for live cell imaging and FRET reporting. *Sci Rep* **6**, 20889 (2016).
- 23 40. Zheng, S.Q. et al. MotionCor2: anisotropic correction of beam-induced motion for  
24 improved cryo-electron microscopy. *Nat Methods* **14**, 331-332 (2017).
- 25 41. Zhang, K. Gctf: Real-time CTF determination and correction. *J Struct Biol* **193**, 1-12  
26 (2016).
- 27 42. Punjani, A., Rubinstein, J.L., Fleet, D.J. & Brubaker, M.A. cryoSPARC: algorithms for  
28 rapid unsupervised cryo-EM structure determination. *Nat Methods* **14**, 290-296 (2017).
- 29 43. Pettersen, E.F. et al. UCSF Chimera--a visualization system for exploratory research  
30 and analysis. *J Comput Chem* **25**, 1605-1612 (2004).
- 31 44. Zhang, T.Y. et al. Prolonged suppression of HBV in mice by a novel antibody that  
32 targets a unique epitope on hepatitis B surface antigen. *Gut* **65**, 658-671 (2016).
- 33 45. Deng, W., Wang, Y., Liu, Z., Cheng, H. & Xue, Y. Heml: a toolkit for illustrating heatmaps.  
34 *PLoS One* **9**, e111988 (2014).
- 35 46. Chang, L. et al. The prevalence of antibodies to SARS-CoV-2 among blood donors in  
36 China. *medRxiv*, 2020.2007.2013.20153106 (2020).

37  
38  
39  
40  
41  
42  
43  
44



1 **Figure S1. SDS-PAGE analyses of various recombinant proteins involved in the**  
2 **study.** Related to Figure 1. (A) SDS-PAGE (left panel) and fluorescence naïve PAGE  
3 (right panel) of SARS-CoV2-RBG. Mr: molecular weight marker; lane 1: supernatants  
4 from transfected cells; lane 2: supernatants after flowing through Ni Sepharose Excel  
5 resin; lane 3: wash fraction with 30 mM imidazole; lane 4: reduced lane 3 sample; lane  
6 5: elution with 250 mM imidazole; lane 6: reduced lane 5 sample. (B-K) SDS-PAGE  
7 analyses of SARS-CoV1-RBG (B), RaTG13-RBG (C), HKU1- RBG (D), MERS- RBG  
8 (E), SARS-CoV2-RBN (F), SARS-CoV2-RBD (G), SARS-CoV2-STG (H), SARS-  
9 CoV2-STN (I), SARS-CoV2-ST (J), and SARS-CoV2-SMG (K). Mr: molecular weight  
10 marker; lane 1: supernatants from transfected cells; lane 2: supernatants after flowing  
11 through Ni Sepharose Excel resin; lane 3: wash fraction with 30 mM imidazole; lane 4:  
12 elution with 250 mM imidazole. The bands corresponding to targeted protein are  
13 denoted with red arrows.

14

15 **Figure S2. Protein characterizations by SEC and Cryo-EM.** Related to Figure 1. (A)  
16 SEC chromatograms of 7 protein standards on a TSK-G3000 column. (B) A calibration  
17 curve based on data of (A) for calculation protein molecular weight. Cryo-EM  
18 reconstructions of CHO-derived SARS-CoV2-ST (C) and SARS-CoV2-STN (D)  
19 proteins. Ten representative 2D classification averages illustrating particles with  
20 prefusion orientations (upper panel). The 8.9-Å density map of SARS-CoV2-ST, and  
21 the ~22-Å density map of SARS-CoV2-STN were colored by protomers, respectively  
22 (lower panel).

23

24 **Figure S3. Live-cell imaging analyses in comparison of the probes of STG and**  
25 **RBG of SARS-CoV-2.** (A) Time-lapse live-cell images from a single observation on  
26 293T-ACE2iRb3 cells incubated with SARS-CoV2-STG (upper panel) and SARS-  
27 CoV2-RBG (lower panel). Scale bar, 20 μm. The cell nucleus H2B-iRFP670 was  
28 pseudo-colored blue. Quantitative comparisons of the internalized fluorescence  
29 intensity ratios of mGam (B) and ACE2-mRuby3 (C) in between 293T-ACE2iRb3 cells  
30 incubated with SARS-CoV2-RBG and SARS-CoV2-STG during 6 to 126 minutes.  
31 Mock indicated untreated cells. Data were mean±SEM derived from time-lapse  
32 imaging of about 200 cells. (D) Split violin plots to compare the numbers of internalized  
33 mGam-active vesicles in between 293T-ACE2iRb3 cells incubated with STG and RBG  
34 at 6, 30, 60 and 120 minutes. (E) Quality measurements of the CSBT (left panel) and  
35 CRBT (right panel) assays. The Z'-factor was determined as described in the Methods  
36 section. Pos-CTR, positive control; Neg-CTR, negative control.

37



1 **Figure S4. Detections of antibody titers of immunized mouse sera by cell-based**  
2 **assays.** (A) LVppNAT on H1299-ACE2hR cells. (B) CSBT and (C) CRBT on 293T-  
3 ACE2iRb3 cells. (D) A summary of the titers (ID50) detected by LVppNAT, CSBT and  
4 CRBT. Serum samples for mice immunized with recombinant proteins of SARS-CoV2-  
5 S1 (mouse S1-1, S1-2, S1-3), SARS-CoV2-S2 (mouse S2-1, S2-2, S2-3) and SARS-  
6 CoV2-RBD (mouse RBD-1, RBD-2, RBD-2, RBD-3, RBD-4, RBD-5) were detected.

7

8 **Figure S5. ELISA analyses for mAbs.** (A) ELISA-binding activities of mAbs to  
9 immobilized SARS-CoV2-RBD (upper panel) and SARS-CoV2-ST (lower panel)  
10 proteins. Recombinant RBD and ST proteins of SARS-CoV-2 were coated on the  
11 ELISA plates at 200 ng/well. Different mAbs were tested at a 3-fold serial dilutions that  
12 began at 10,000 ng/mL. (B) Epitope binning assays for mAbs. A heatmap  
13 representation of a cross-competition ELISA with 18 mAbs developed in this study. The  
14 mAbs listed on the horizontal axis were conjugated with HRP and were used to react  
15 with the RBD-coated microplate. The mAbs listed on the vertical axis were the  
16 competitor mAb. A reduction of >70% of ELISA OD values of RBD-mAb-HRP capture  
17 in the presence of competitor mAb was considered as an effective inhibition. The mAb  
18 clusters were generated based on the inhibition data by using Heml software.

19

20 **Figure S6. SPR sensorgrams showing the binding kinetics for SARS-CoV2-RBD**  
21 **and immobilized mAbs.** Related to Figure 4C and Table S4. Colored lines  
22 represented a global fit of the data at known concentrations using a 1:1 binding model.

23

24 **Figure S7. Titrations of mAbs in CRBT, LVppNAT and authentic SARS-CoV-2**  
25 **neutralization assays.** (A) Inhibition potencies of mAb, which have typical dose-  
26 dependent inhibitory effects, in CRBT assay. A broken line indicates the demarcation  
27 line of 50% inhibition. (B) Dose-response curves of mAbs with enhancement potential  
28 in CRBT assay. The upper broken line indicates the demarcation line of 50% inhibition,  
29 whereas the lower broken line indicates the demarcation line of 50% enhancement. (C)  
30 Neutralization potencies of the mAbs against SARS-CoV-2 measured by using  
31 LVppNAT. (D) Neutralization tests of the mAbs of 36H6, 2B4, 34B4, 83H7, 8H6, and  
32 CR3022 against SARS-CoV-1 LVpp. (E) Neutralization potencies of the 36H6 and 2B4  
33 mAbs against authentic SARS-CoV-2 virus. ctrAb, control mAb.

34

35 **Figure S8. Biacore analyses for the influence of Fabs derived from various mAbs**  
36 **on the interaction between ACE2 and SARS-CoV2-RBD.** SPR sensorgrams  
37 showing the binding of SARS-CoV2-RBD (200 nM) to with immobilized human ACE2

1 (200 nM) in the presence of various Fabs at different concentrations (800, 400, 200,  
2 100, 50, 25, 12.5, 6.25, and 3.13 nM of Fab were tested).

3

4 **Figure S9. Correlations between the LVppNAT and the activities measured by**  
5 **CSBT, CRBT, and ELISAs for mAbs.** The relationship between CSBT-IC50 and  
6 LVppNAT-IC50 (A). Correlations between CRBT-IC50 and LVppNAT-IC90 (B) or  
7 LVppNAT-IC50 (C). Correlations between LVppNAT-IC90 and RBD-binding affinity (D),  
8 RBD-ELISA binding activities (E), ST-ELISA binding activities of mAb (F), respectively.

9

10 **Figure S10. SPR sensorgrams showing the binding kinetics for 6 representative**  
11 **mAbs to SARS-CoV1-RBG (A) and RaTG13-RBG (B).** Related to Figure 4C and  
12 Table S4. The mAbs of 36H6, 2B4, 34B4, 5F3, 18C5, and 8H6 were tested at 2-fold  
13 serial dilutions (200, 100, 50, 25, 12.5, 6.25, 3.13, 1.56, 0.78, 0.39, and 0.19 nM).

14

15 **Figure S11. Characterization of compound-induced influence on STG**  
16 **internalization on ACE2-expressing cells.** (A) Comparisons of cytoplasmic STG  
17 intensity (cMFI) of 293T-ACE2iRb3 cells treated by various compounds. Related to  
18 Figure 6. Cell imaging was performed 1-hour post STG incubation and the cMFI were  
19 calculated following approach as described in Figure 2D. (B) Colocalizations of  
20 internalized STG vesicles and lysosomes in H1299-ACE2hR cells treated by various  
21 compounds. STG exhibited green fluorescent signal, the lysosome was stained with  
22 Lysoview633 showing red fluorescent signal. Fluorescent images were obtained at 5-  
23 hour post STG incubation. Both for (A) and (B), the cells were pretreated with  
24 compounds at their maximal non-cytotoxic concentrations for 1-hour before STG probe  
25 loading.

26

27 **Figure S12. Compound-induced changes of on STG-internalization related**  
28 **characteristics correlate with the inhibitory effects against SARS-CoV-2 LVpp**  
29 **infection.** Related to Figure 6. Correlations between the characteristic parameters of  
30 STG-IVNs (left panel), STG-IVA (middle panel), STG-IFR (right panel) at 1-hour (upper  
31 panel) or 5-hour (lower panel) (data were derived from Figure 6D), and the relative  
32 SARS-CoV-2 LVpp infection efficiency (%), (data were derived from Figure 6B).

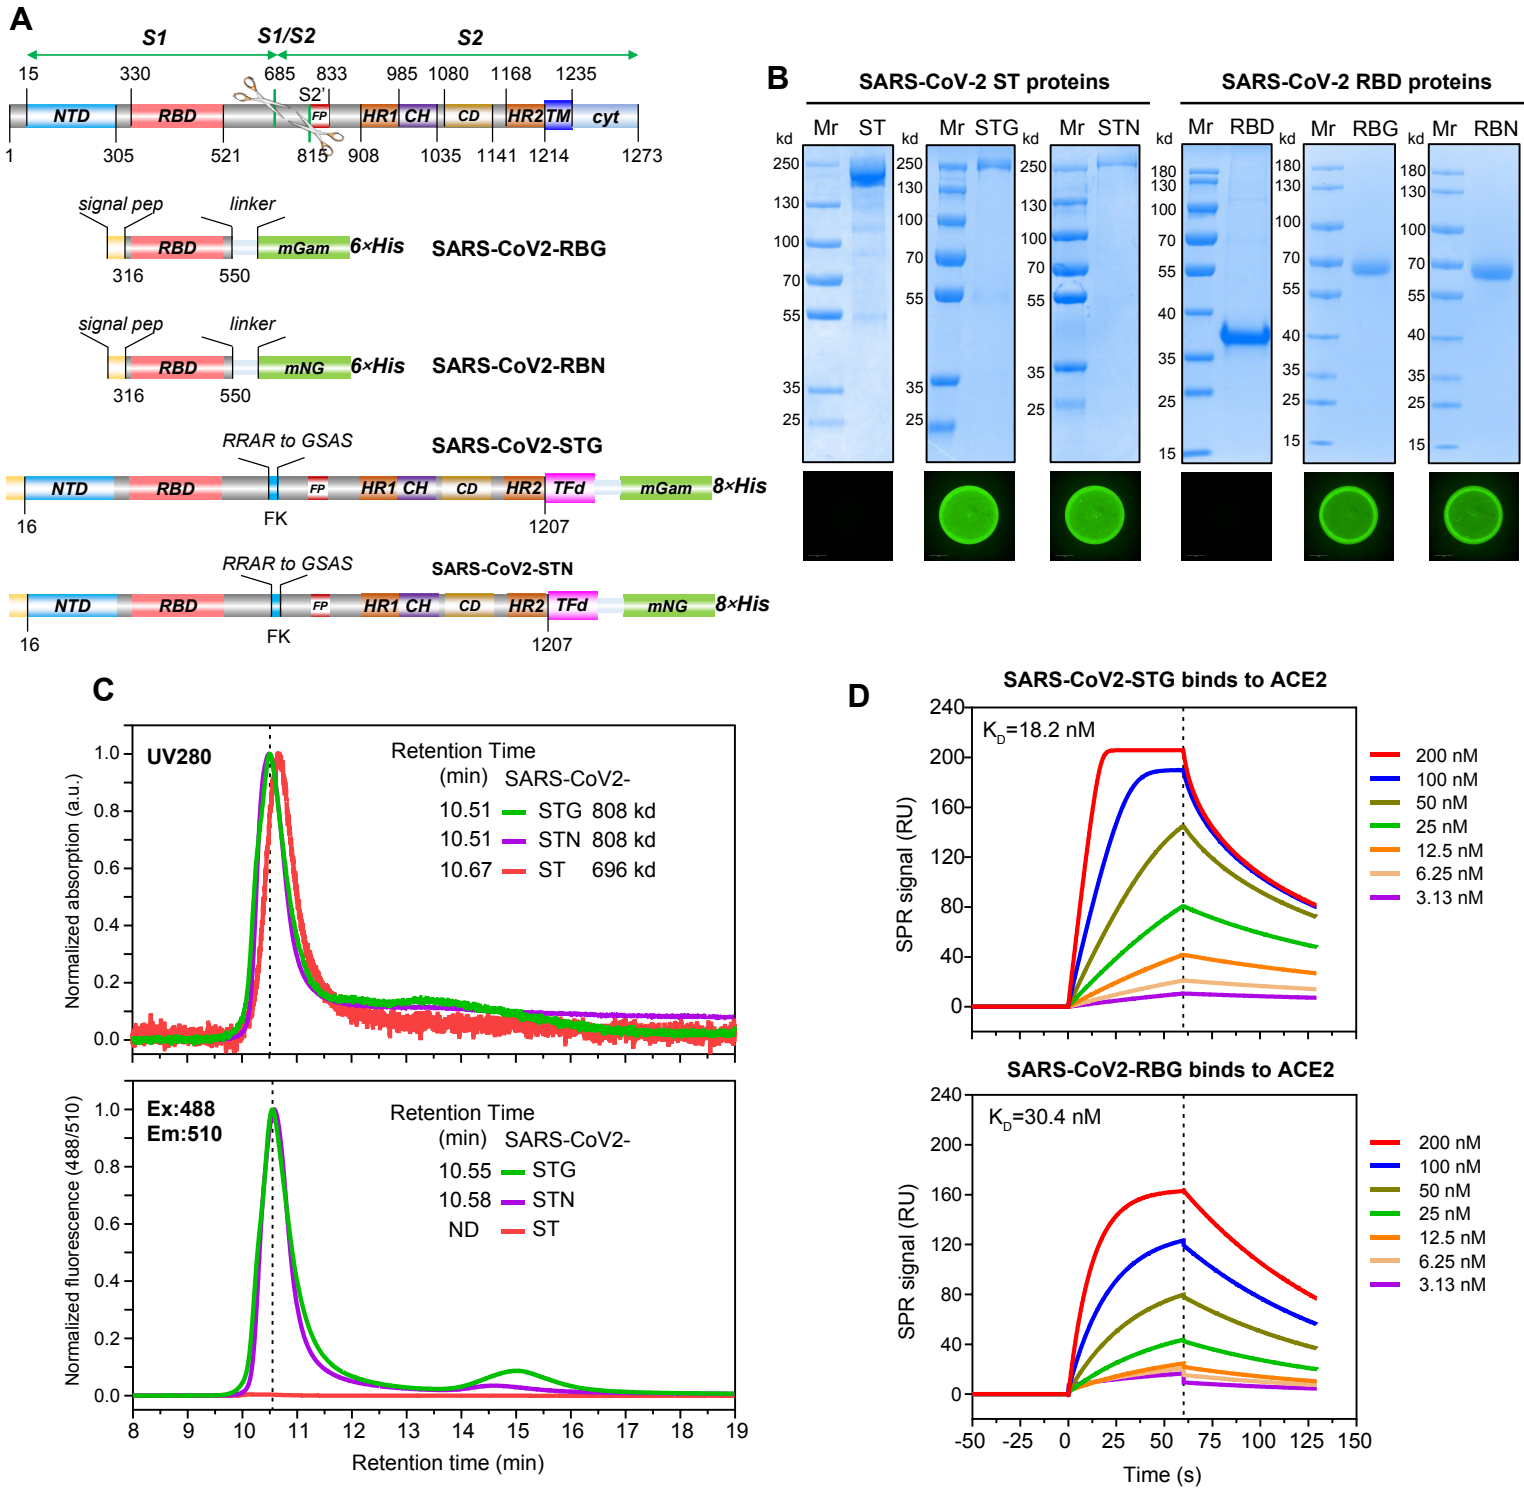

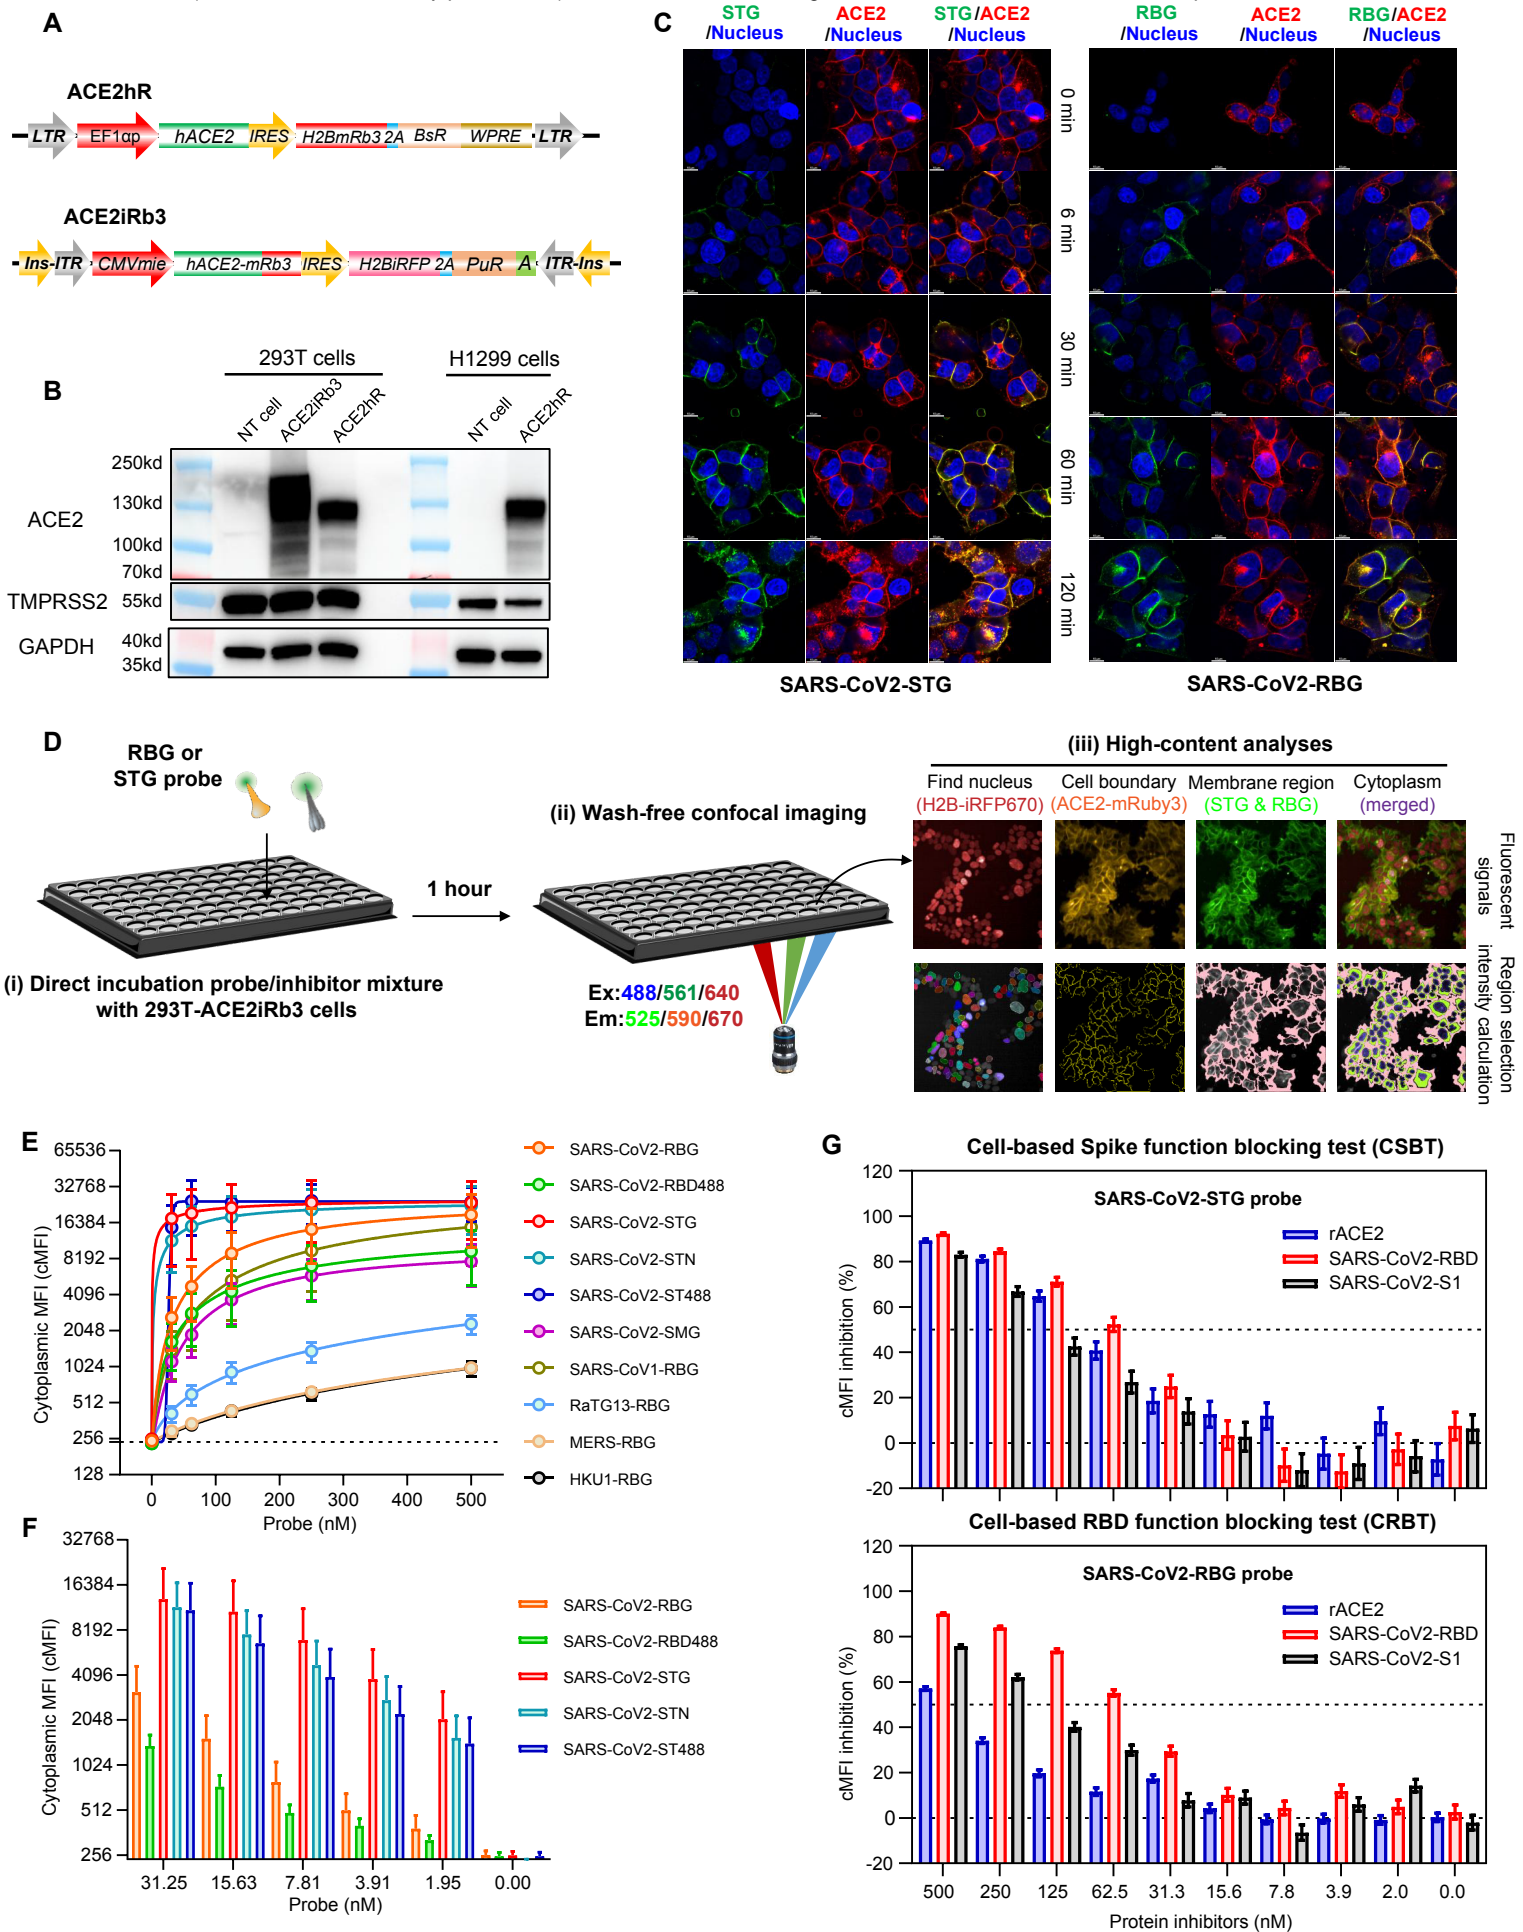

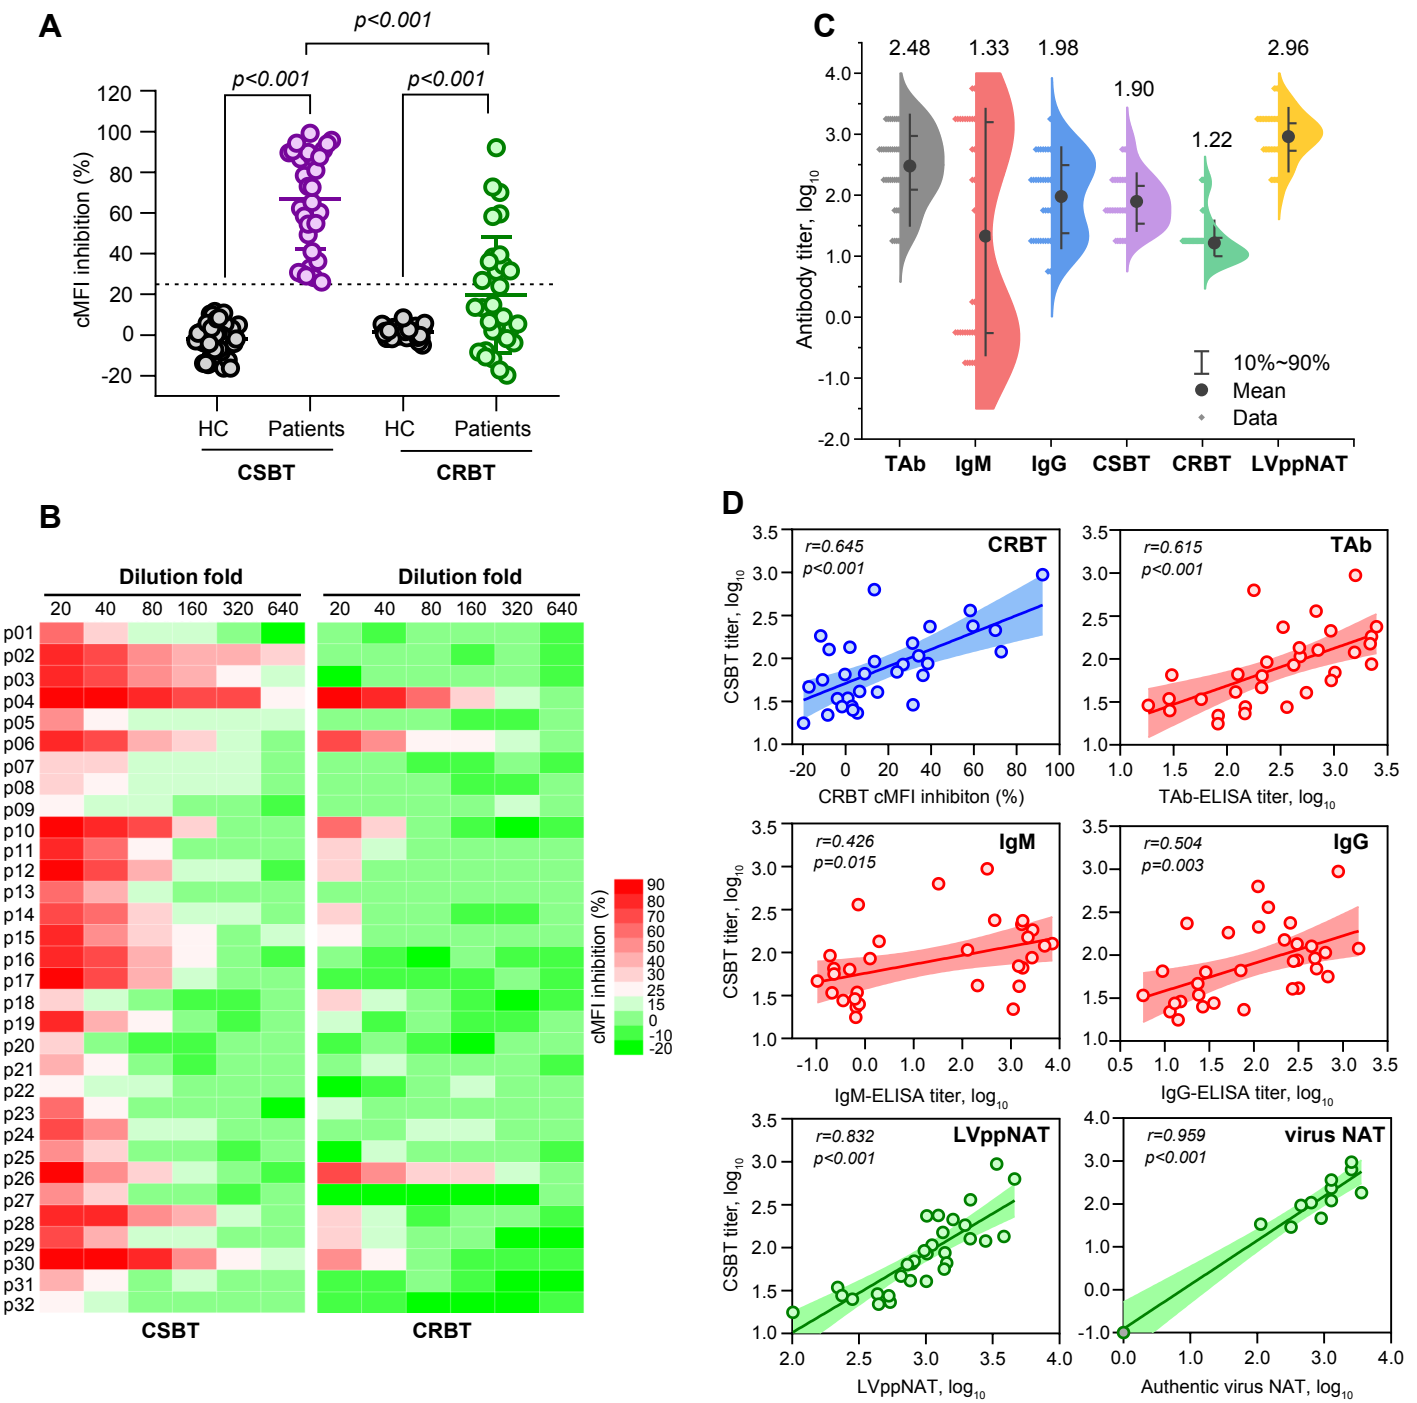



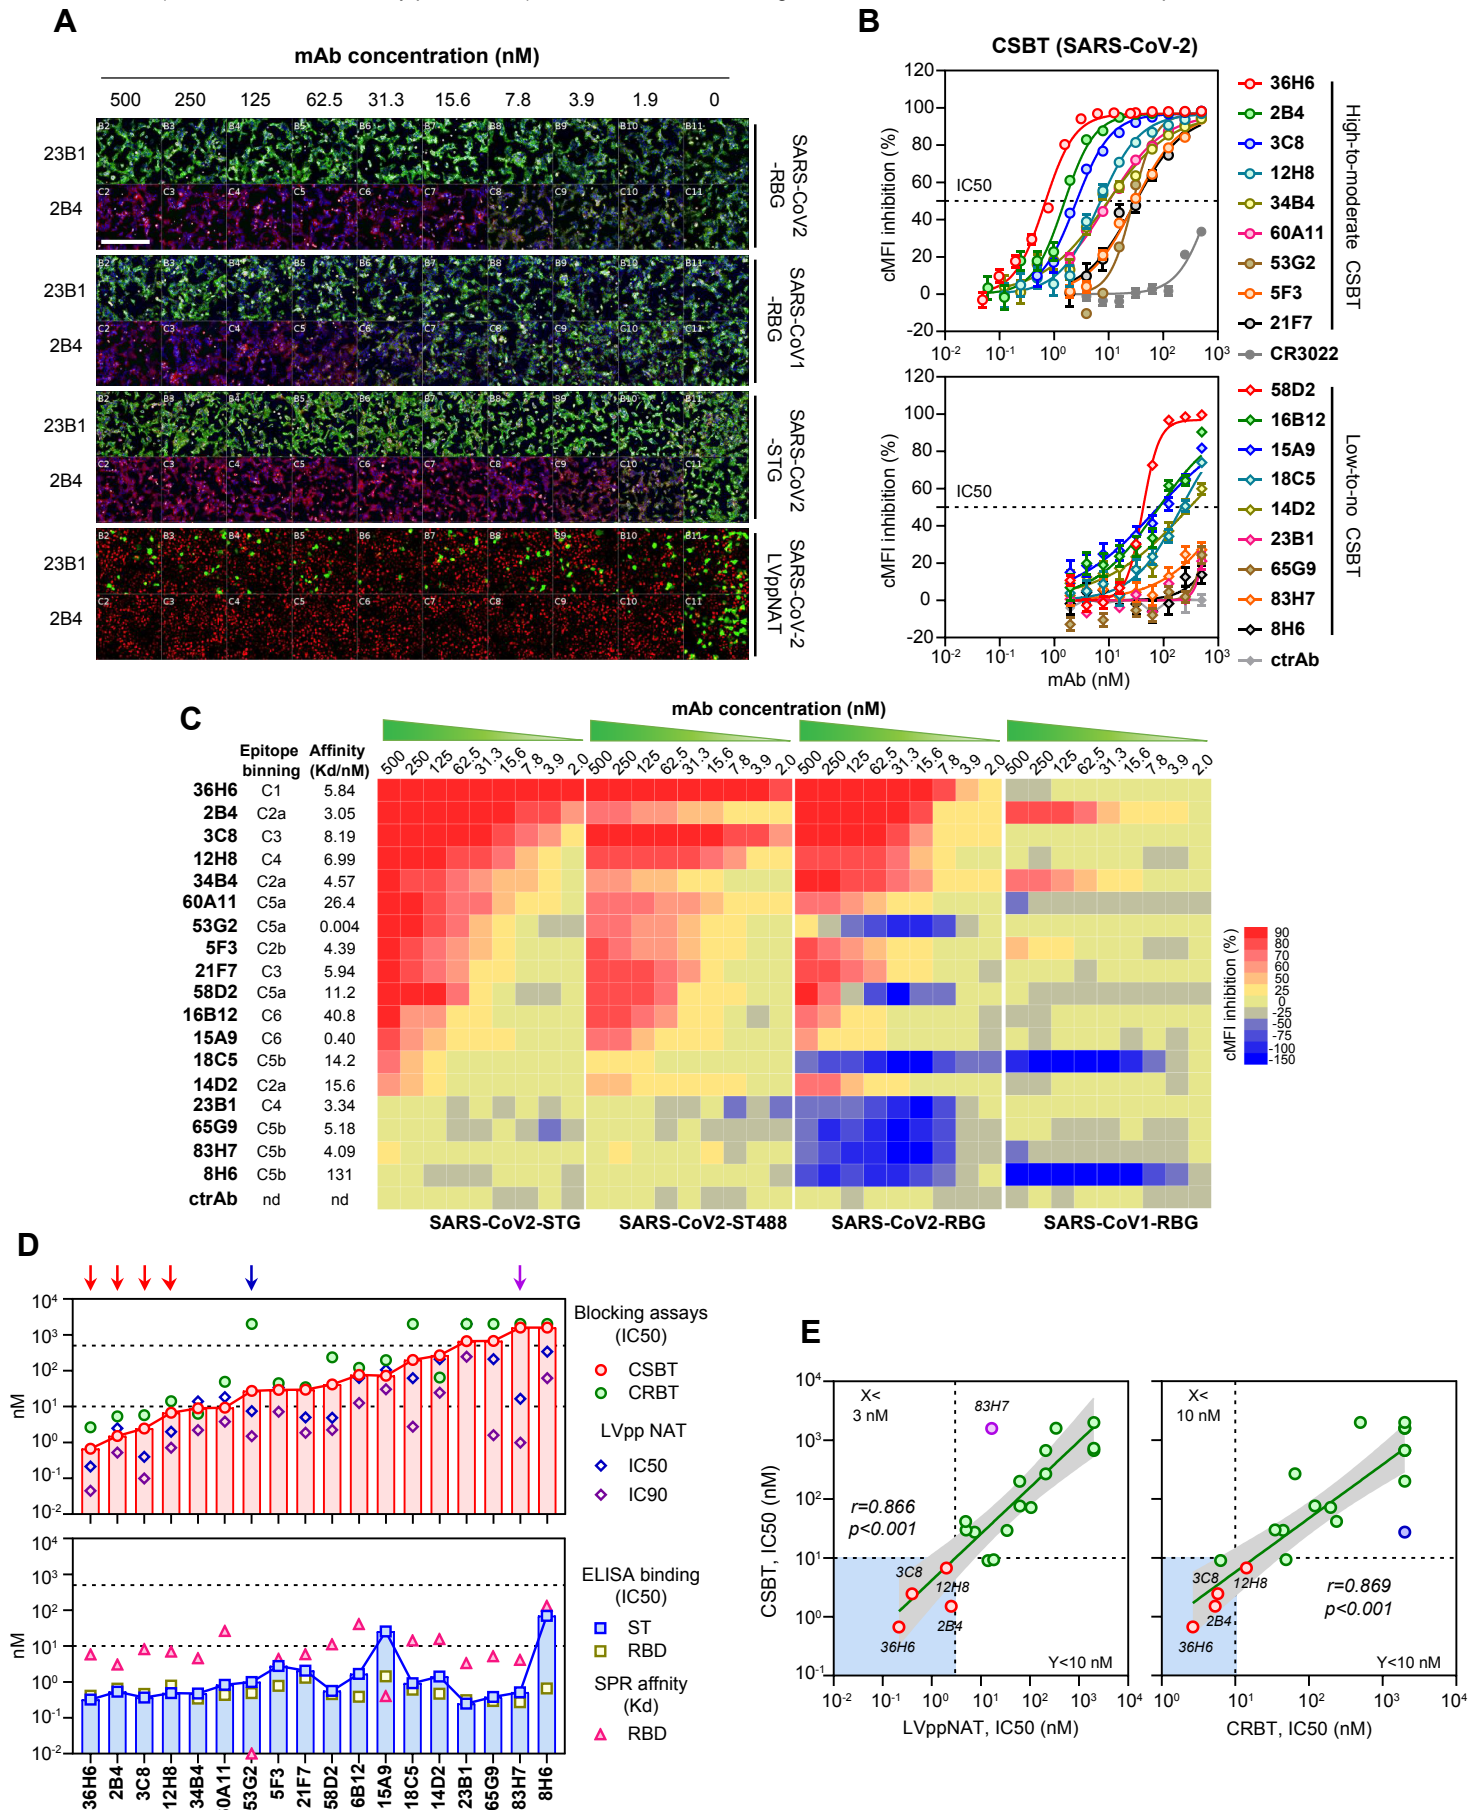

## Figure 5

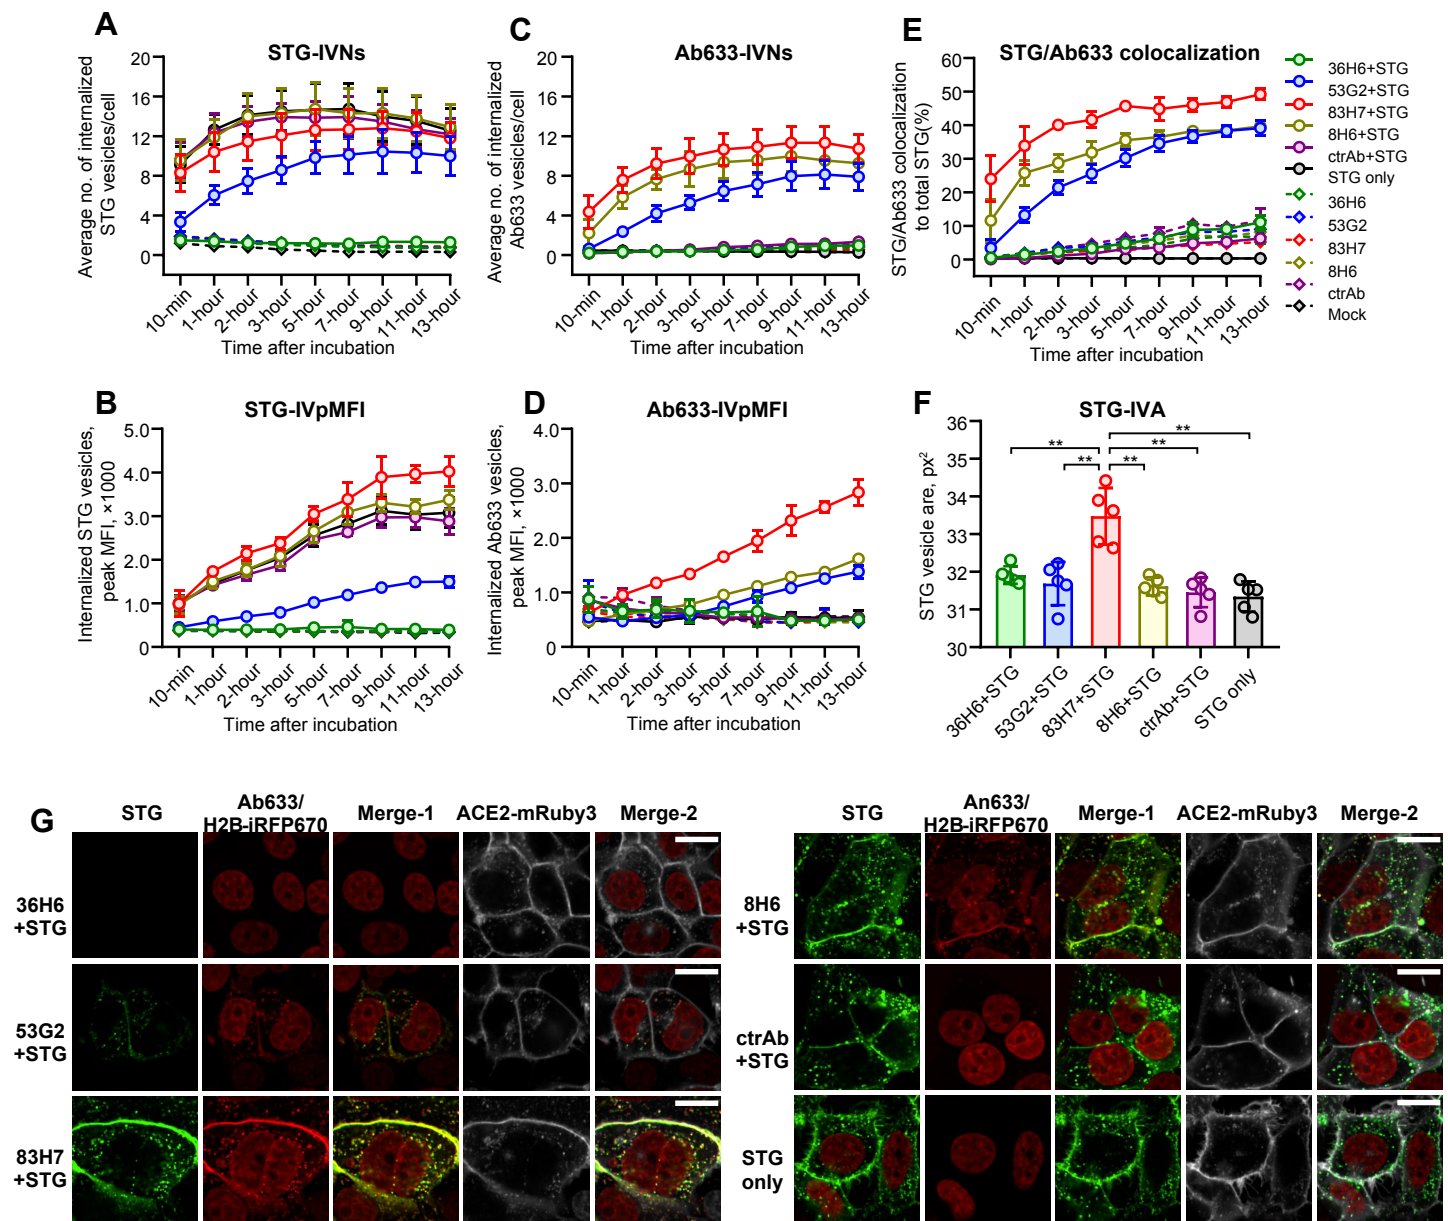



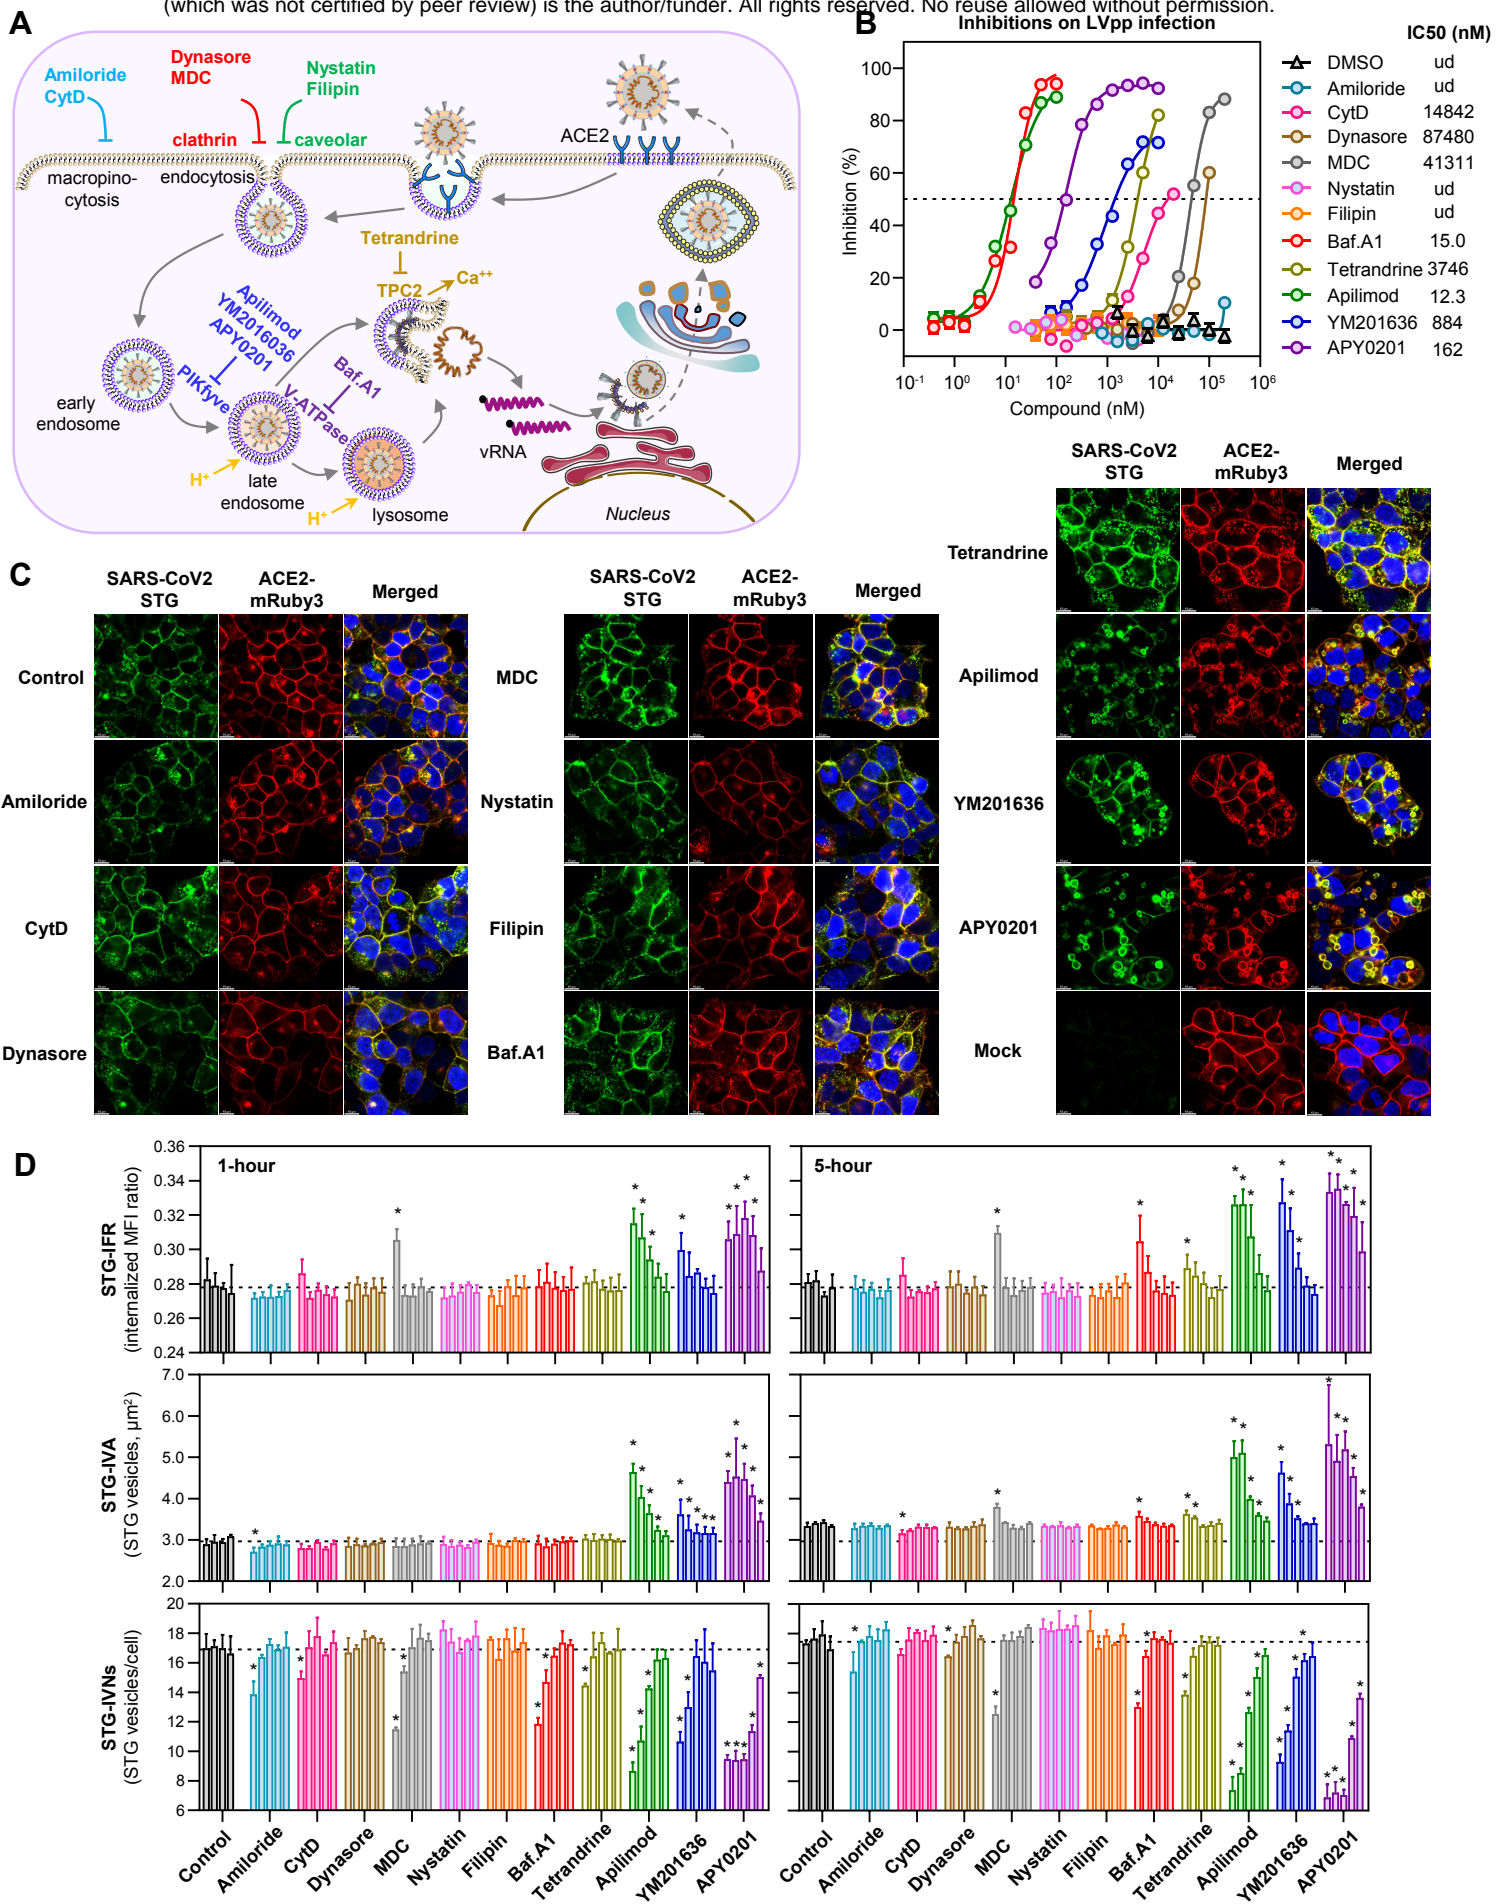

Source: https://biorxiv.org/content/10.1101/2020.07.22.215236v1.full.pdf
